# Supplementary material
Source: publisher figshare collection journal article supplement (https://tandf.figshare.com/ndownloader/files/22408623)

**Supplementary Material**

Synthesis, Structure and Reactivity of Some Chiral Benzylthio Alcohols, 1,3-Oxathiolanes and their *S*-Oxides

R. Alan Aitken*, Philip Lightfoot and Andrew W. Thomas

EaStCHEM School of Chemistry, University of St Andrews, St Andrews, UK

Page

1H NMR and 13C NMR spectra of **5** 2, 3

1H NMR and 13C NMR spectra of **6** 4, 5

1H NMR and 13C NMR spectra of **7** 6, 7

1H NMR and 13C NMR spectra of **8** 8, 9

13C NMR spectrum of **10** 10

1H NMR and 13C NMR spectra of **11** 11, 12

1H NMR and 13C NMR spectra of **12** 13, 14

13C NMR spectrum of **13** 15

1H NMR and 13C NMR spectra of **15** 16, 17

1H NMR and 13C NMR spectra of **16** 18, 19

1H NMR and 13C NMR spectra of **17** 20, 21

1H NMR and 13C NMR spectra of **19** 22, 23

1H NMR and 13C NMR spectra of **20** 24, 25

1H NMR and 13C NMR spectra of *trans-***18** 26, 27

1H NMR and 13C NMR spectra of FVP product from **20** 28, 29

300 MHz 1H NMR spectrum of **5**


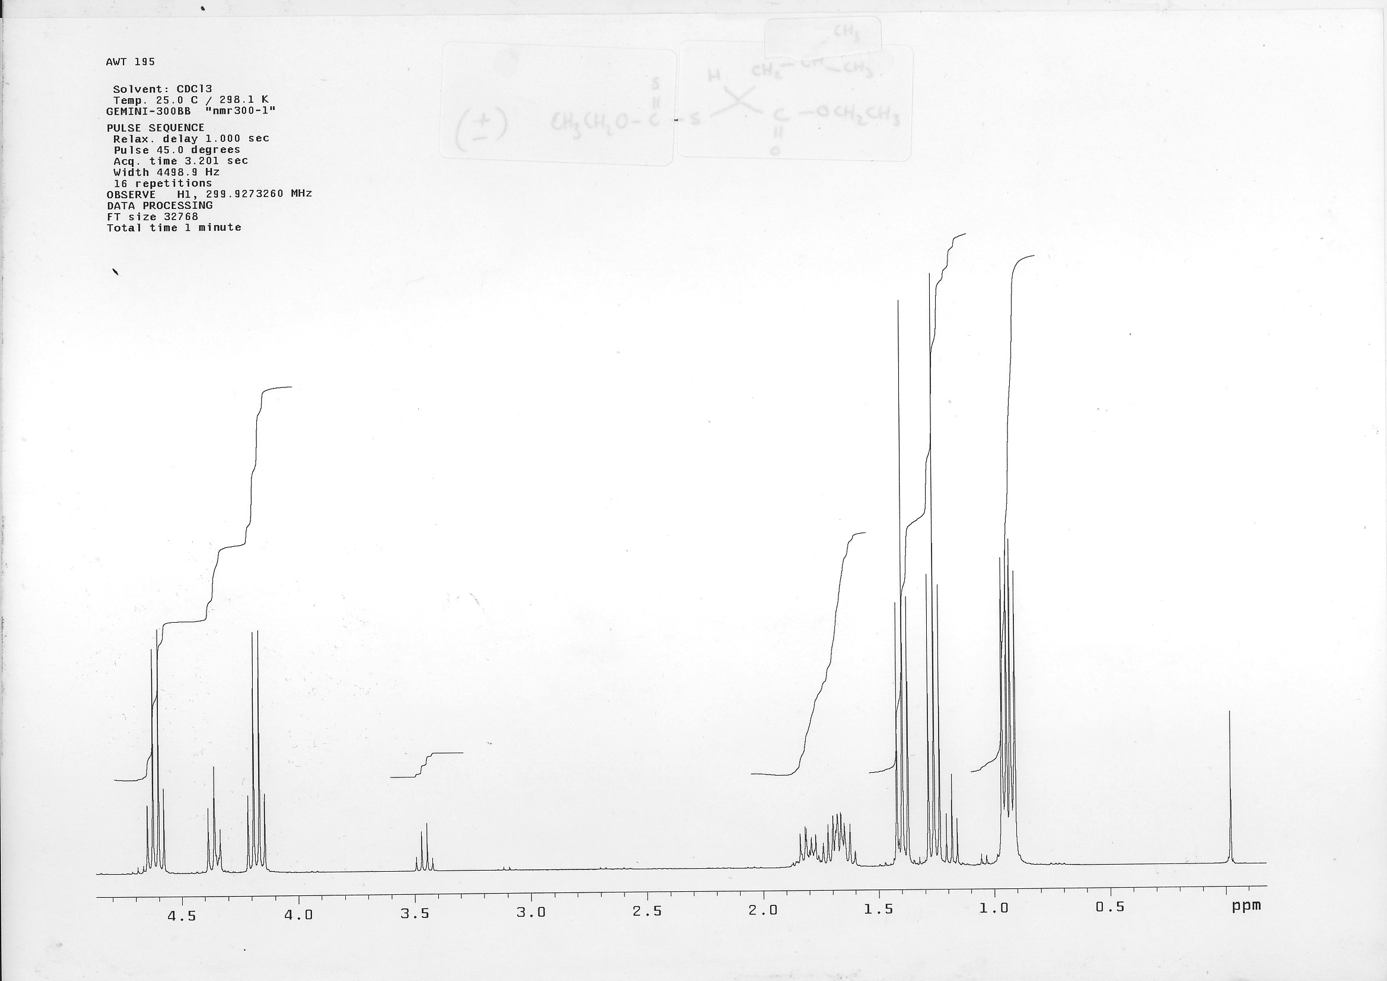


75 MHz 13C NMR spectrum of **5**


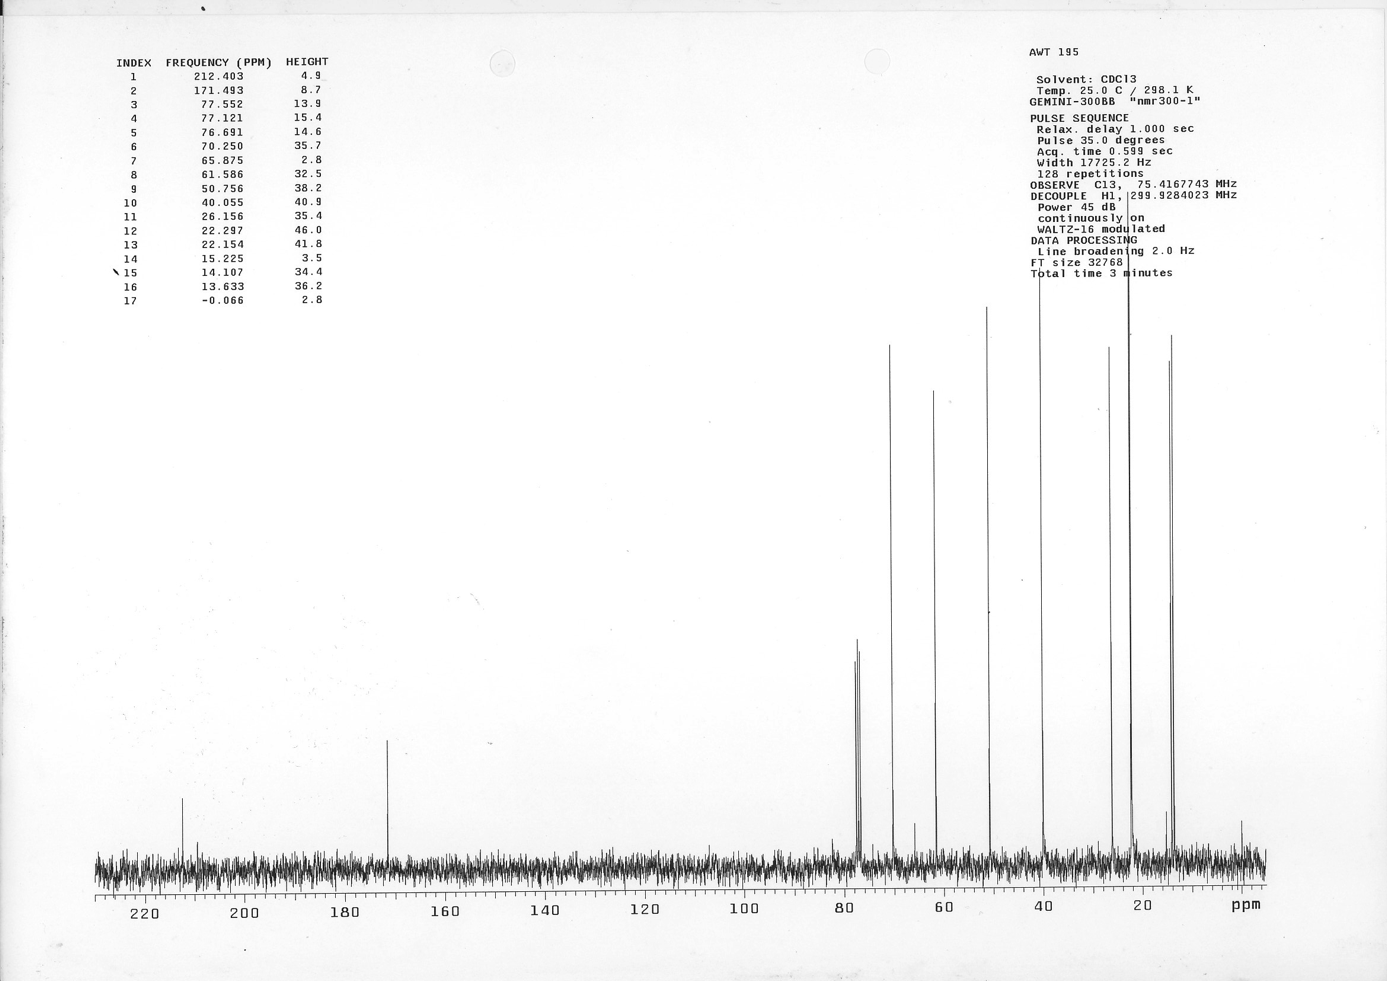


300 MHz 1H NMR spectrum of **6**


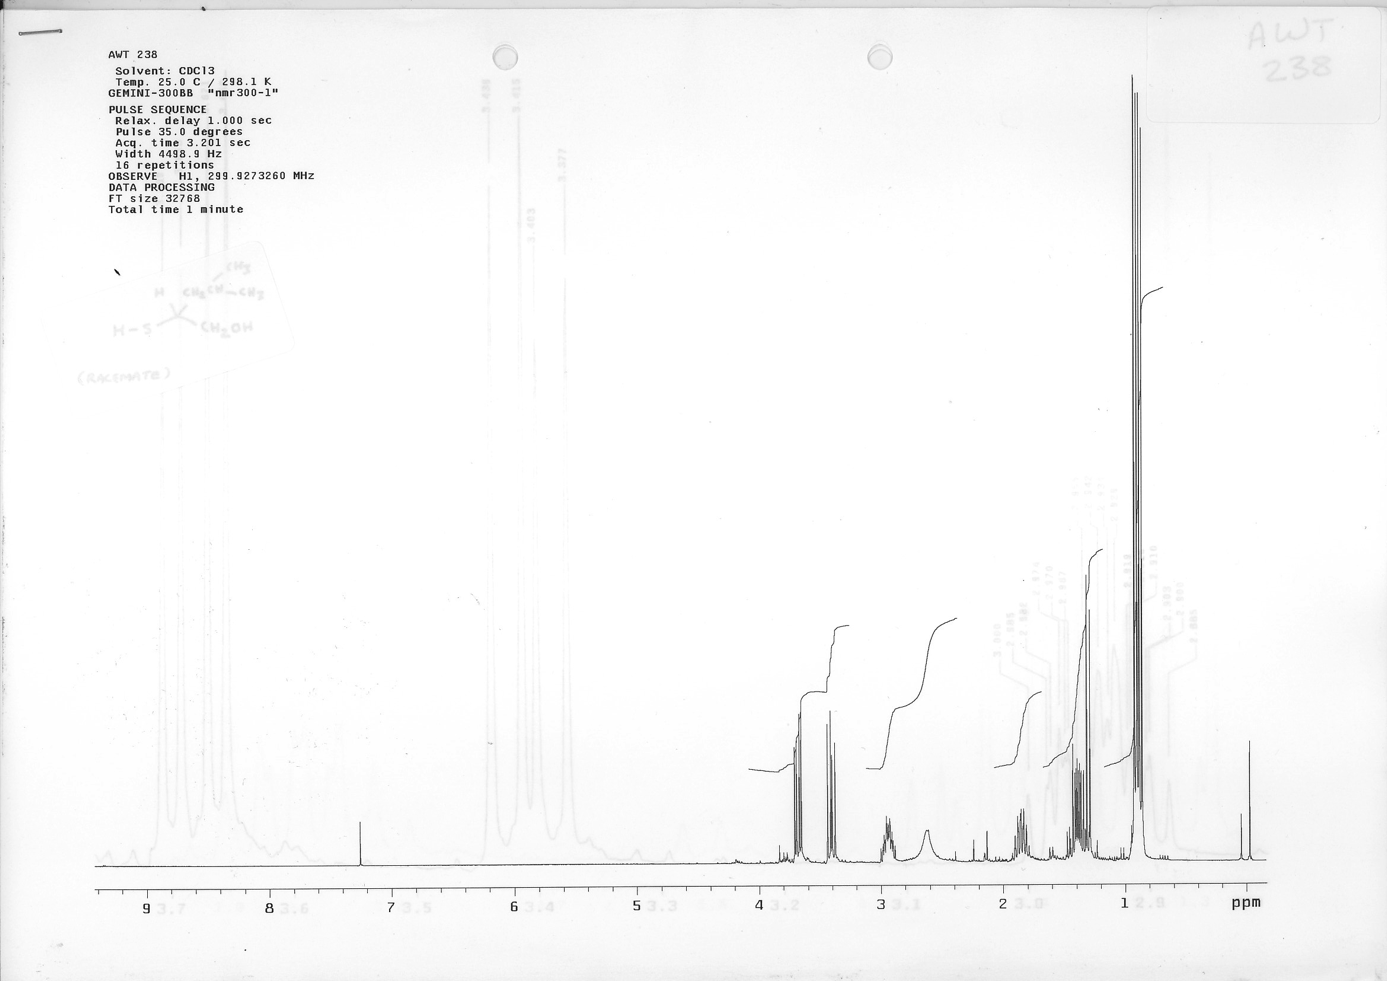


75 MHz 13C NMR spectrum of **6**


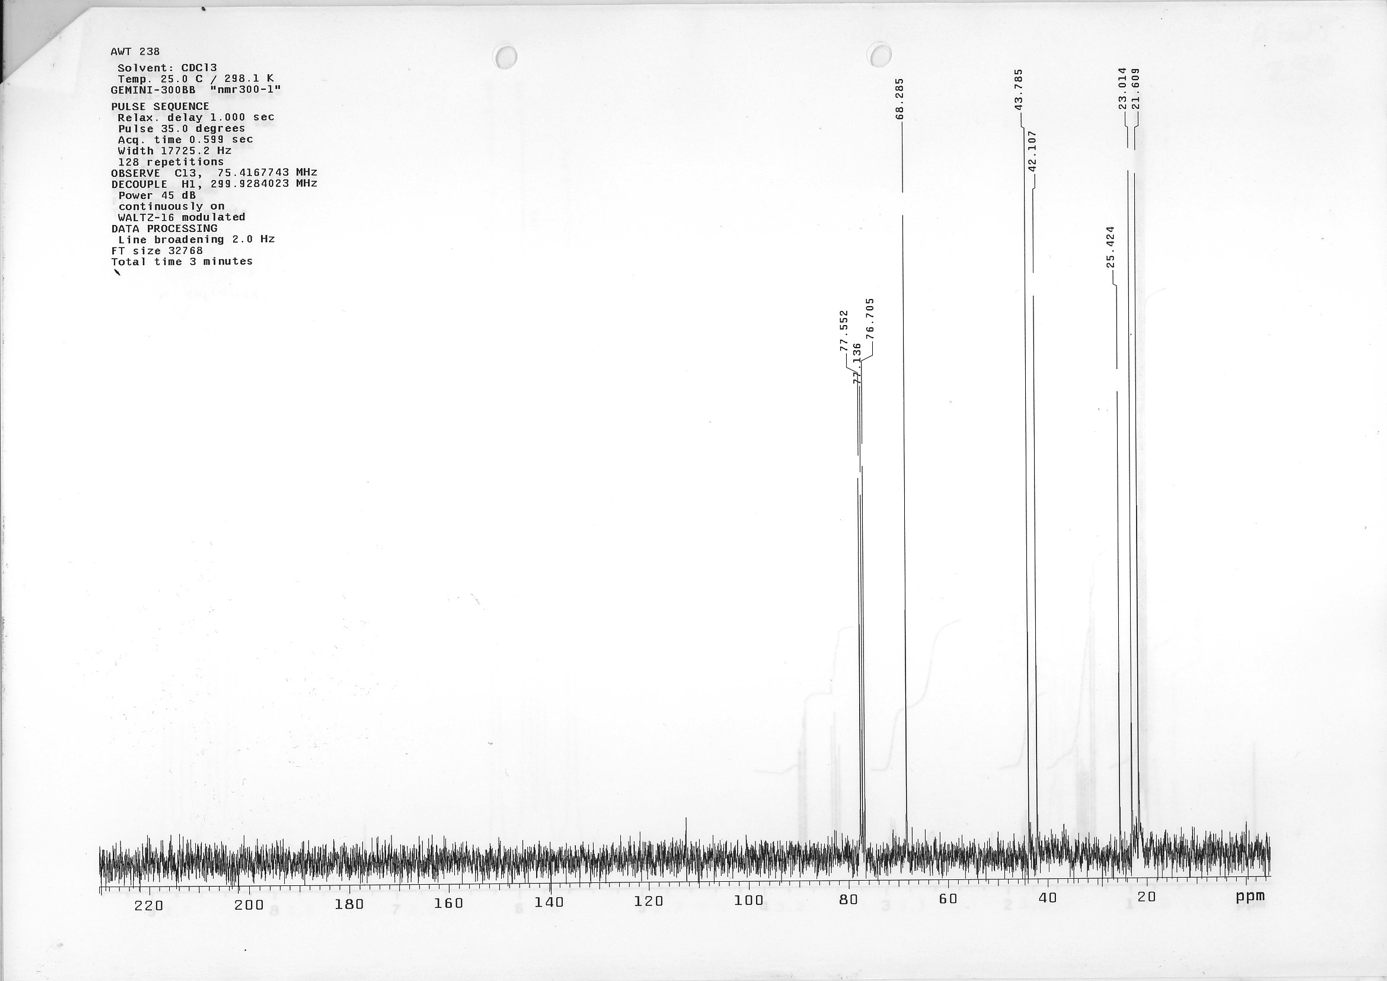


200 MHz 1H NMR spectrum of **7**


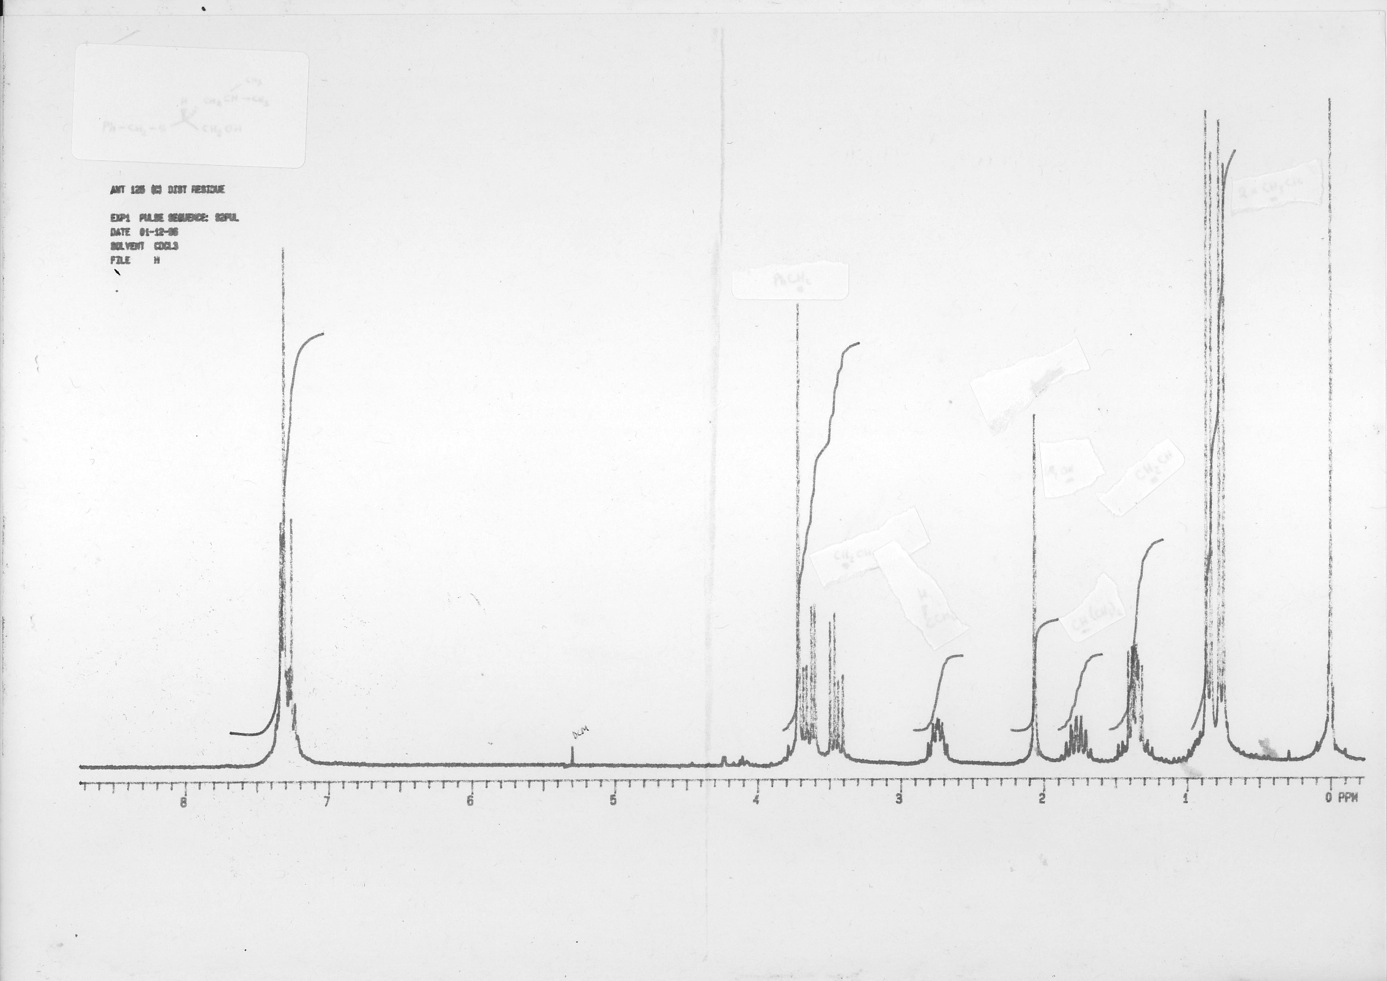


50 MHz 13C NMR spectrum of **7**


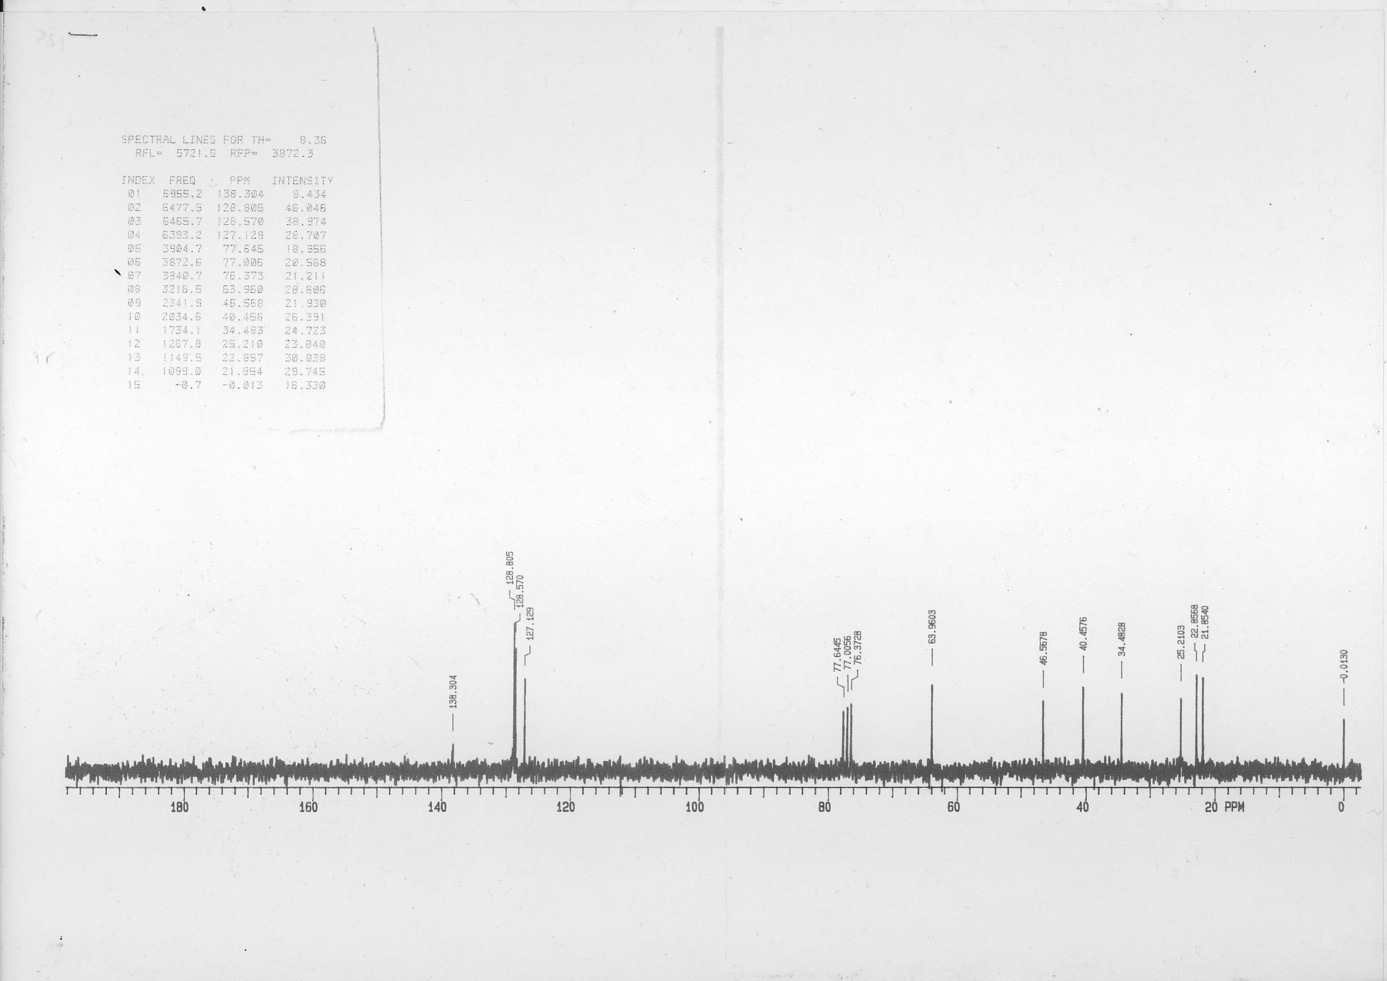


200 MHz 1H NMR spectrum of **8**


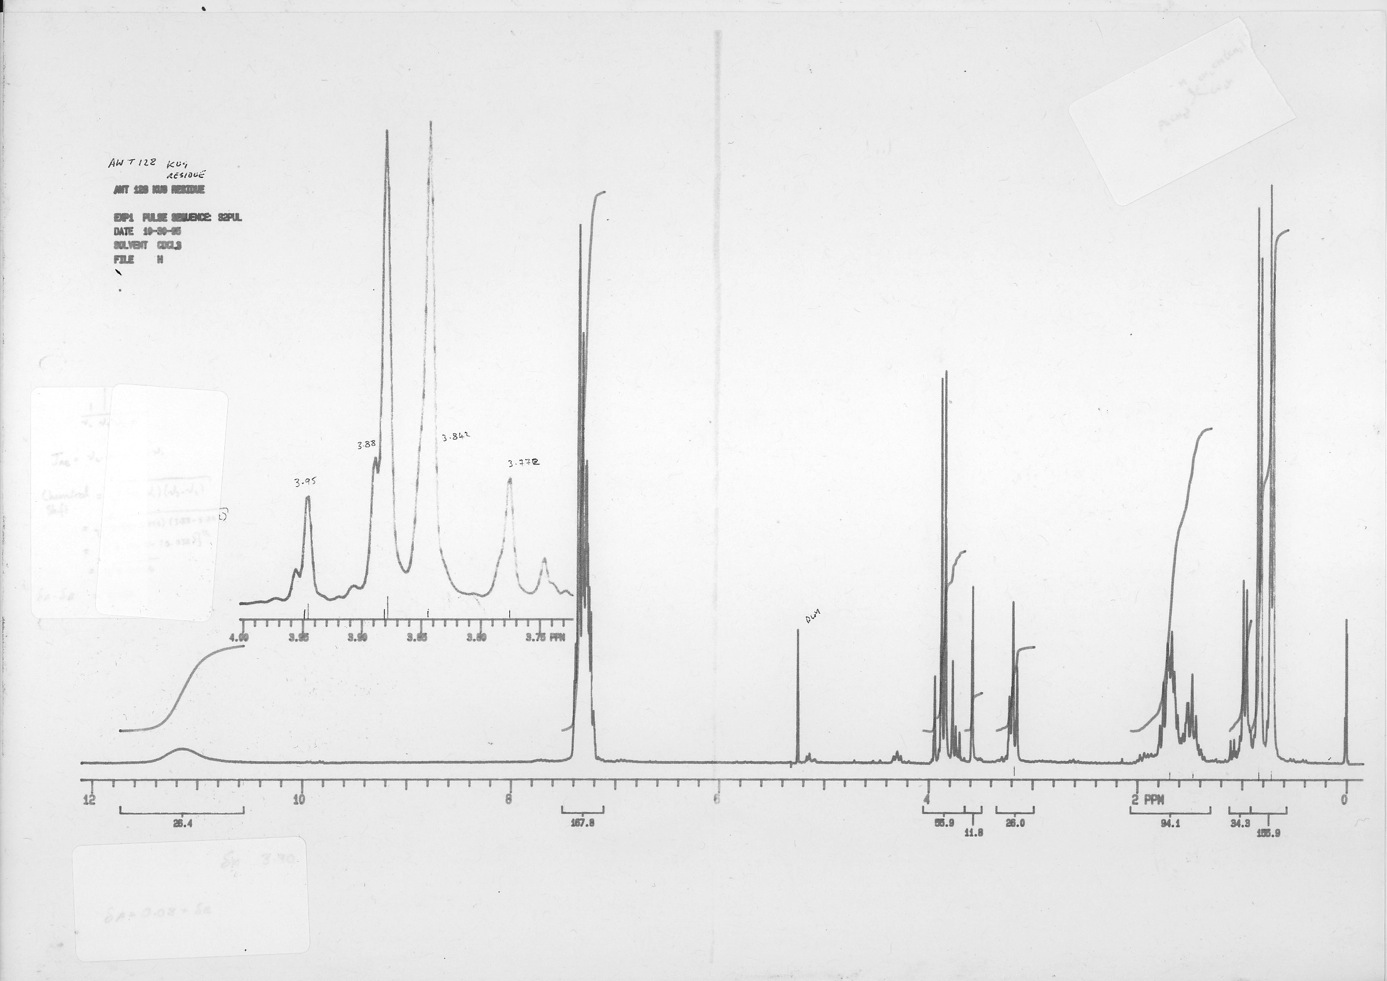


50 MHz 13C NMR spectrum of **8**


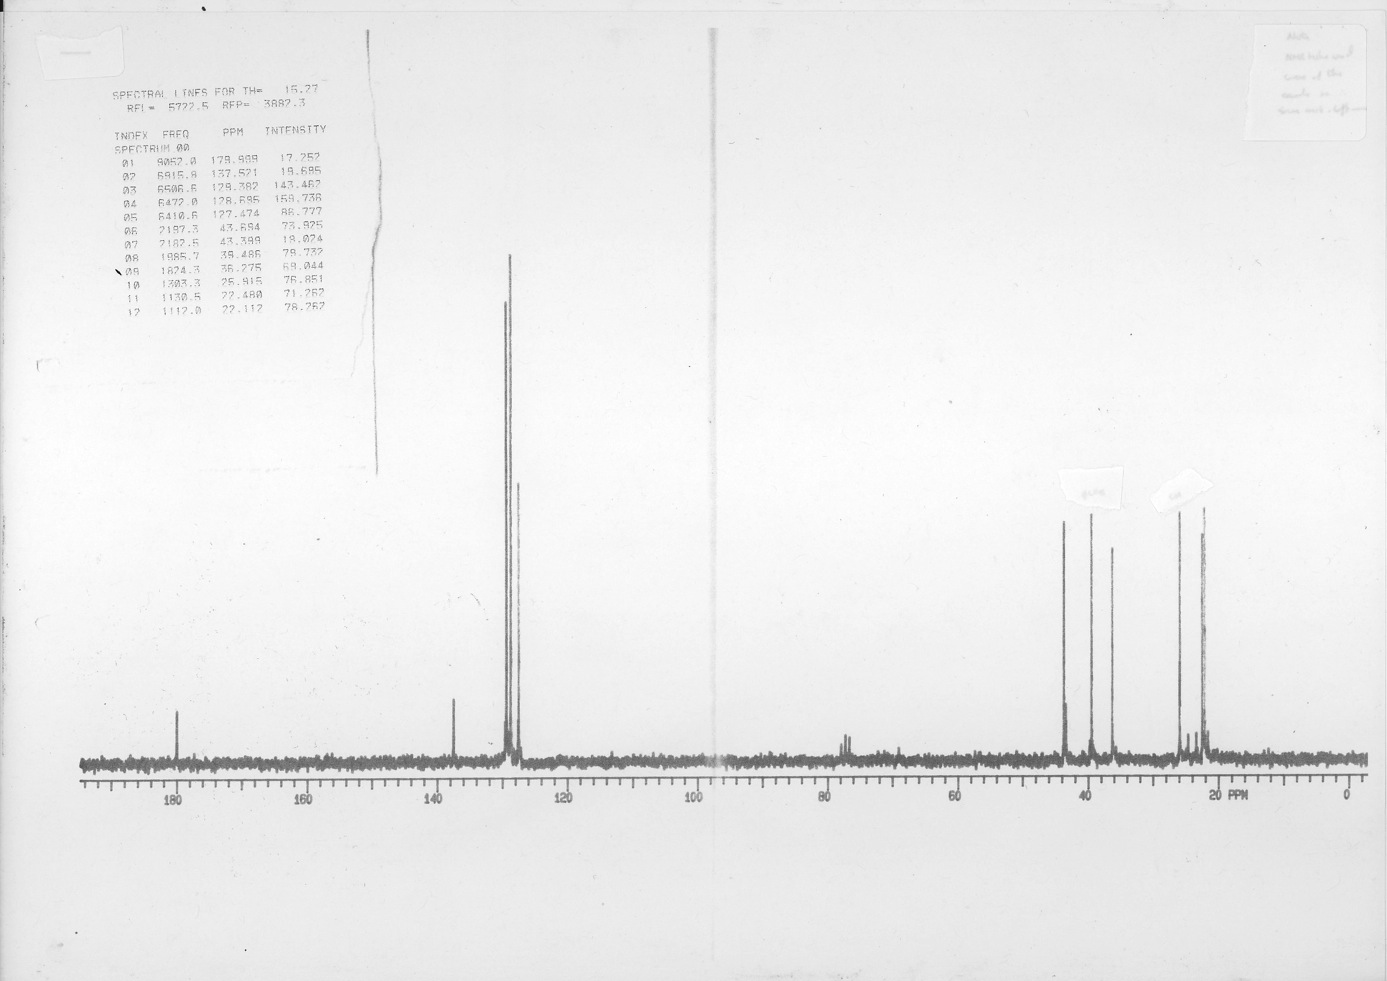


75 MHz 13C NMR spectrum of **10**


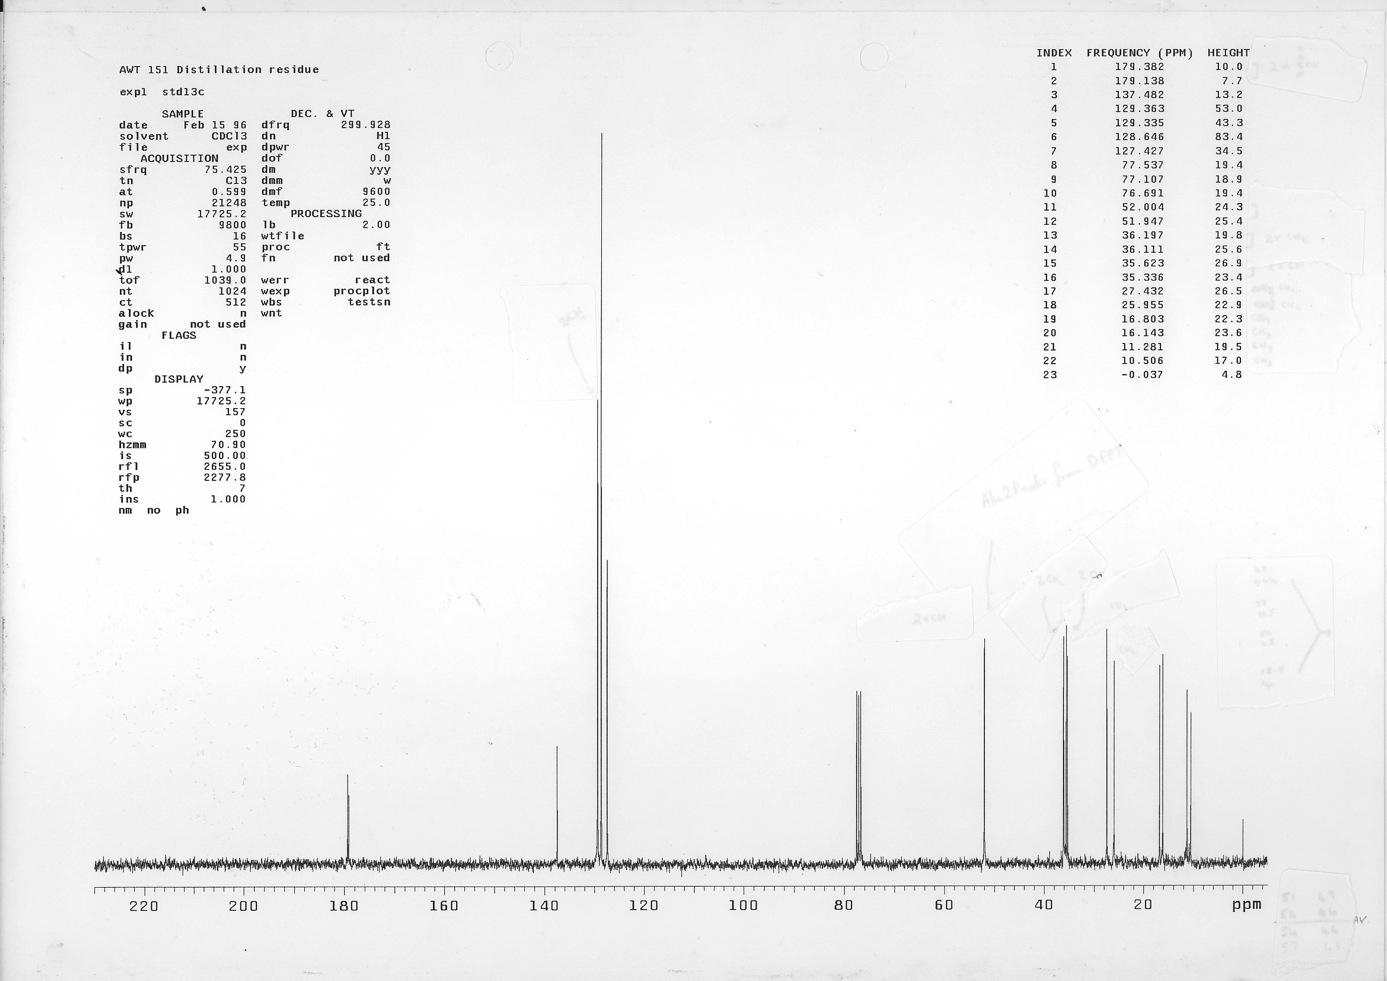


300 MHz 1H NMR spectrum of **11**


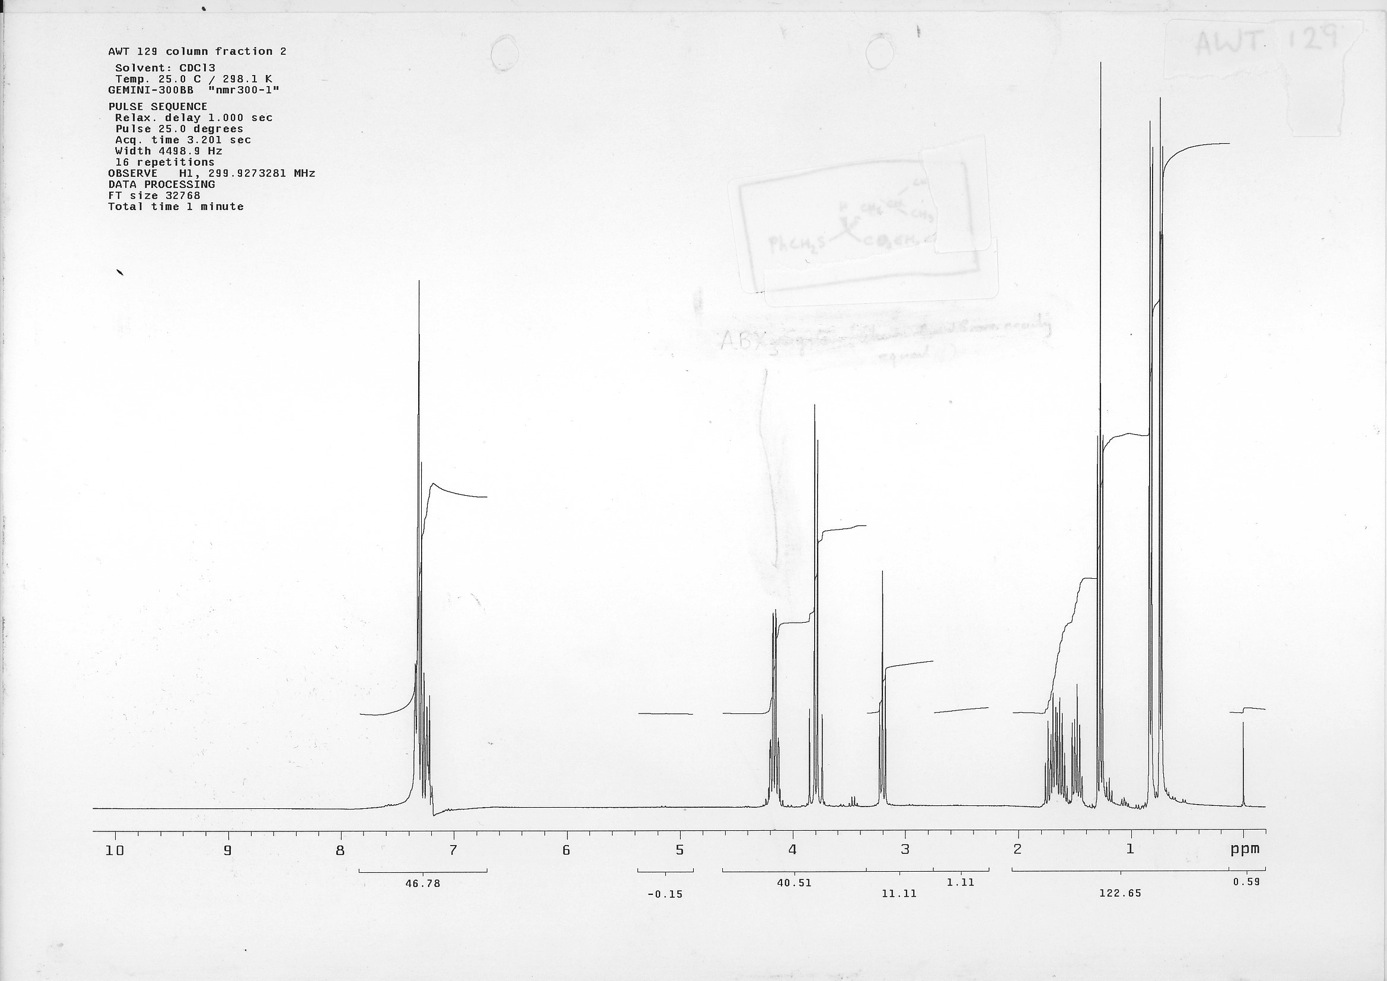


75 MHz 13C NMR spectrum of **11**


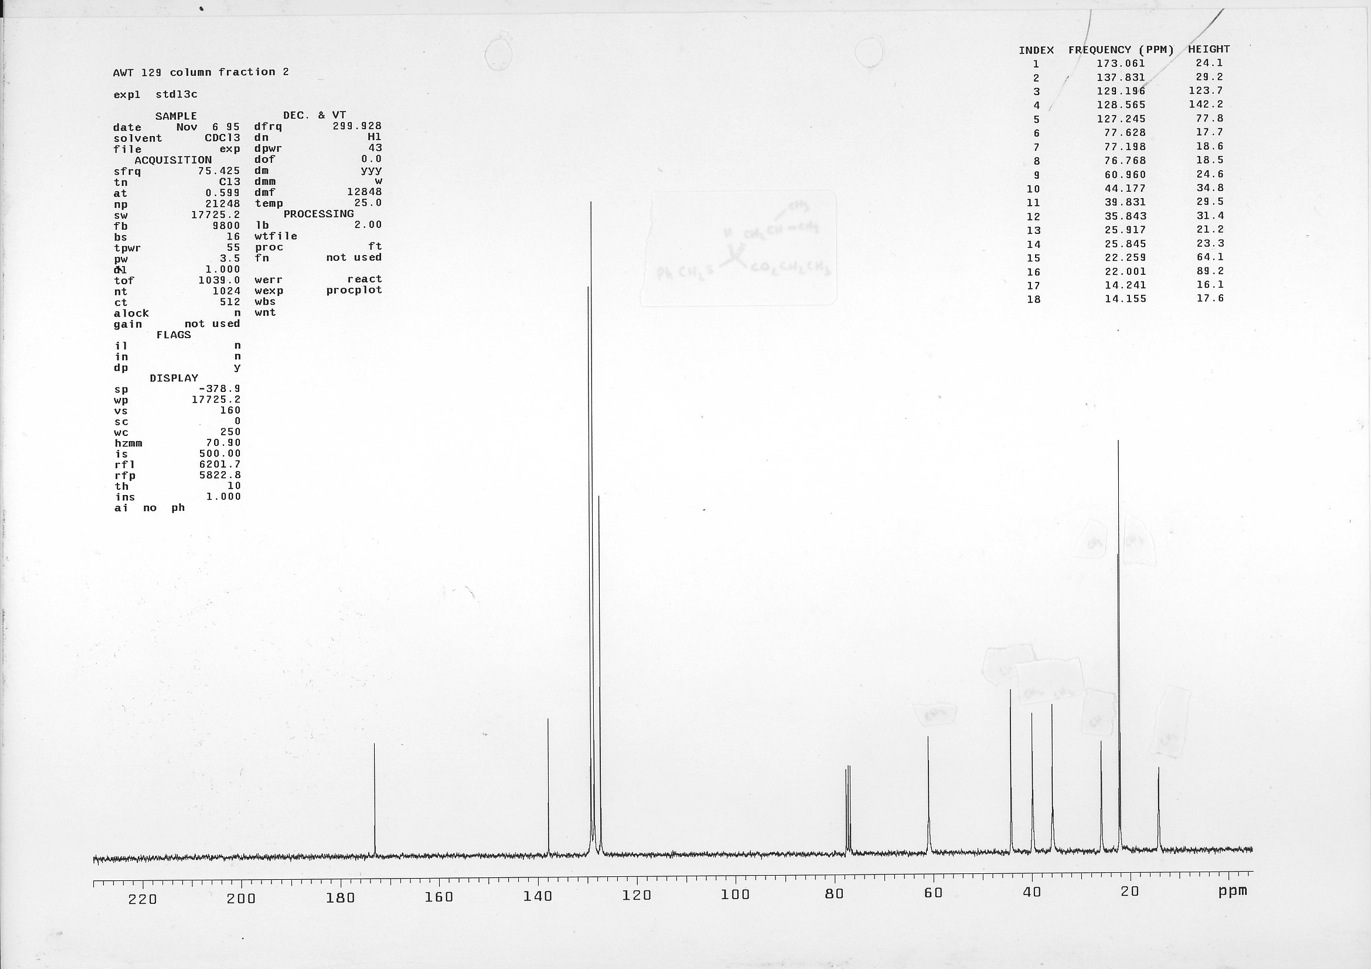


300 MHz 1H NMR spectrum of **12**


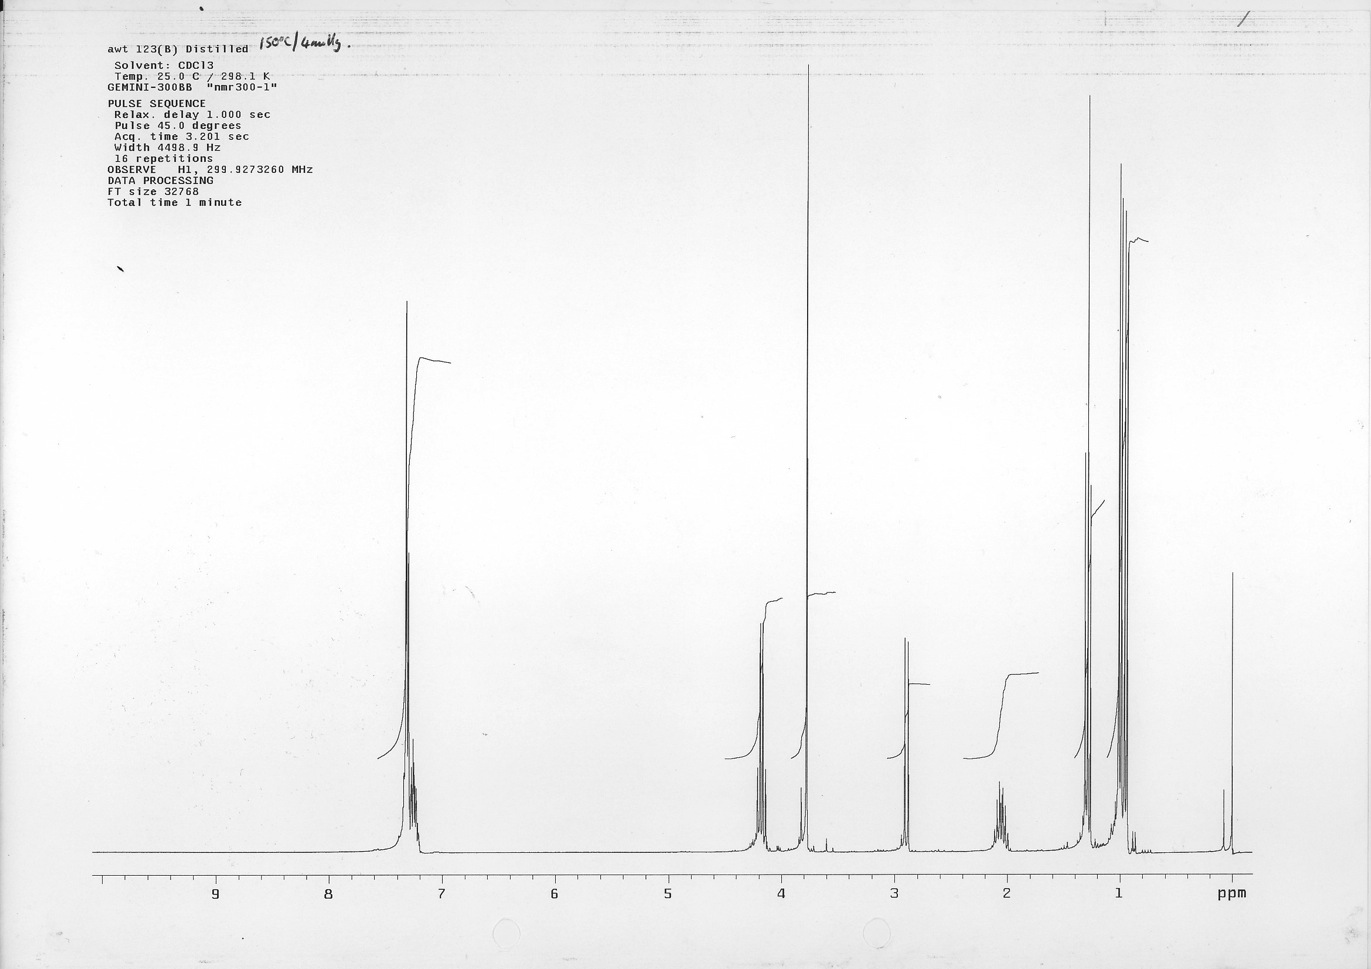


75 MHz 13C NMR spectrum of **12**


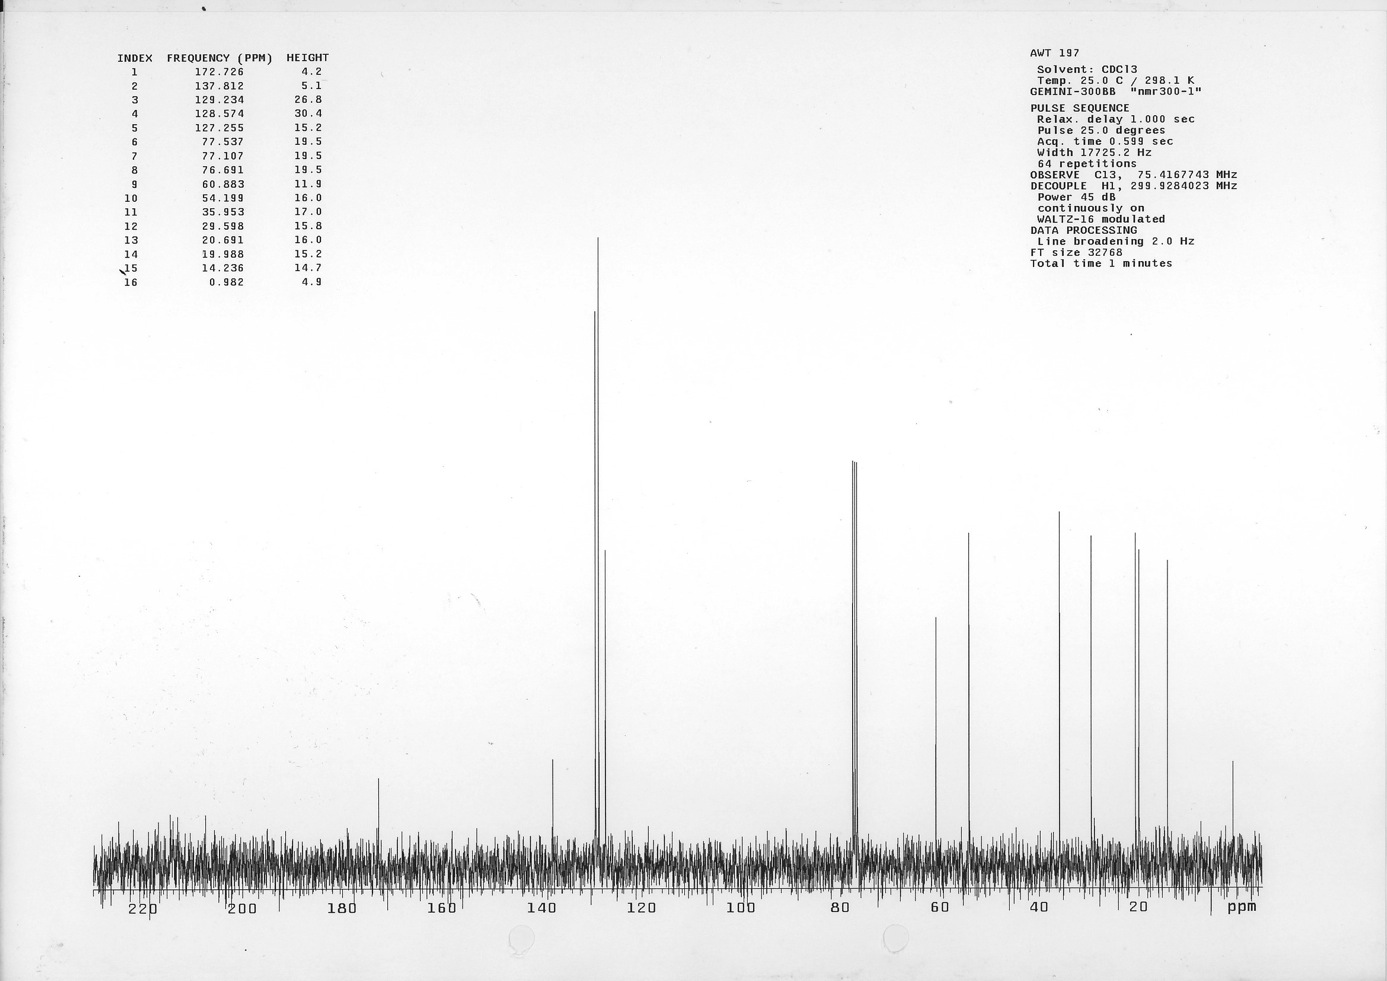


75 MHz 13C NMR spectrum of **13**


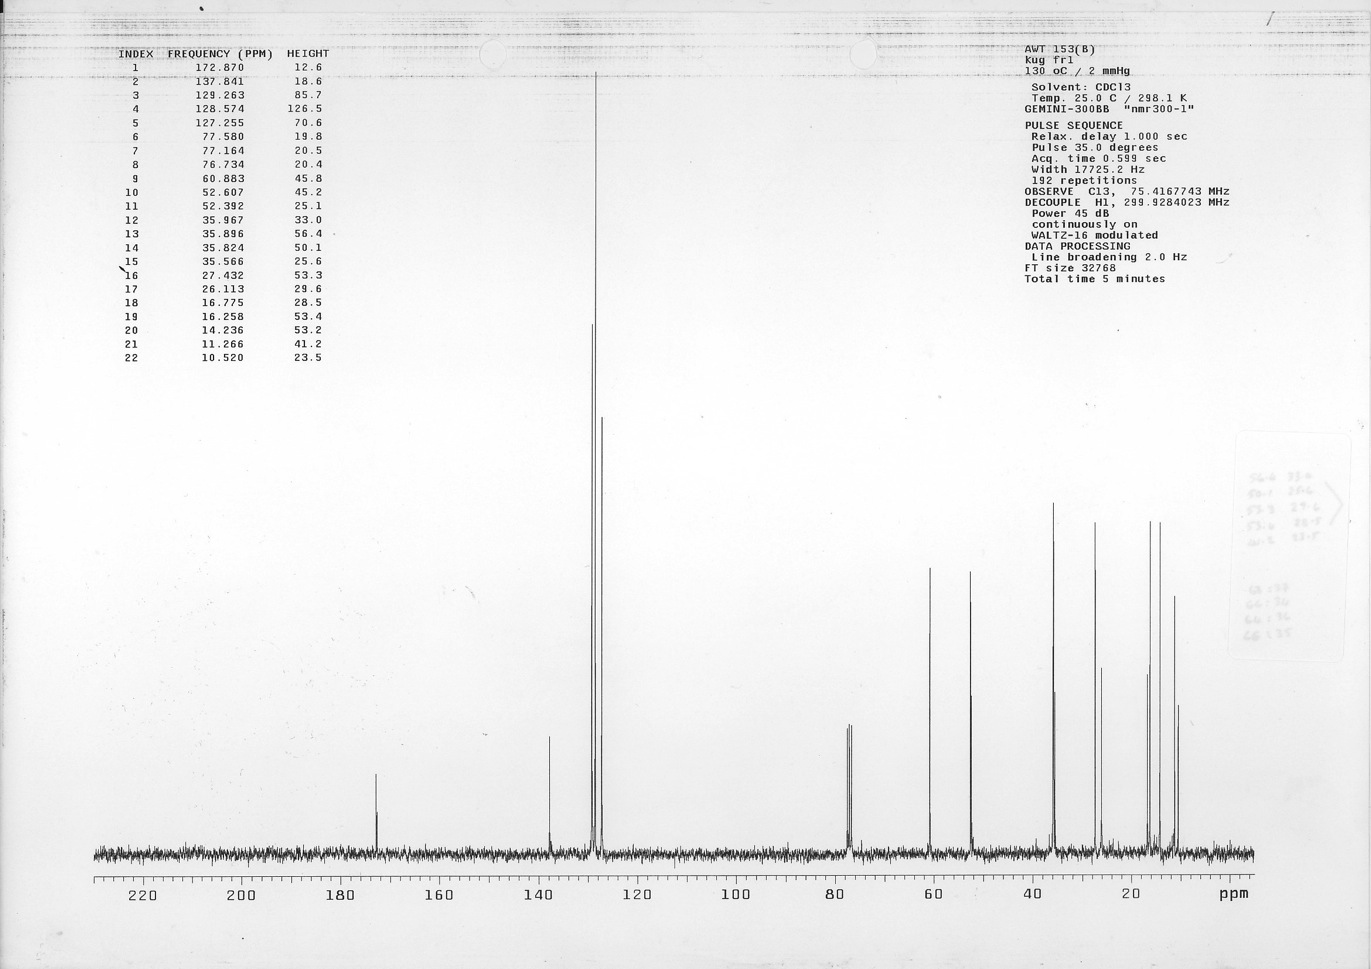


300 MHz 1H NMR spectrum of **15**


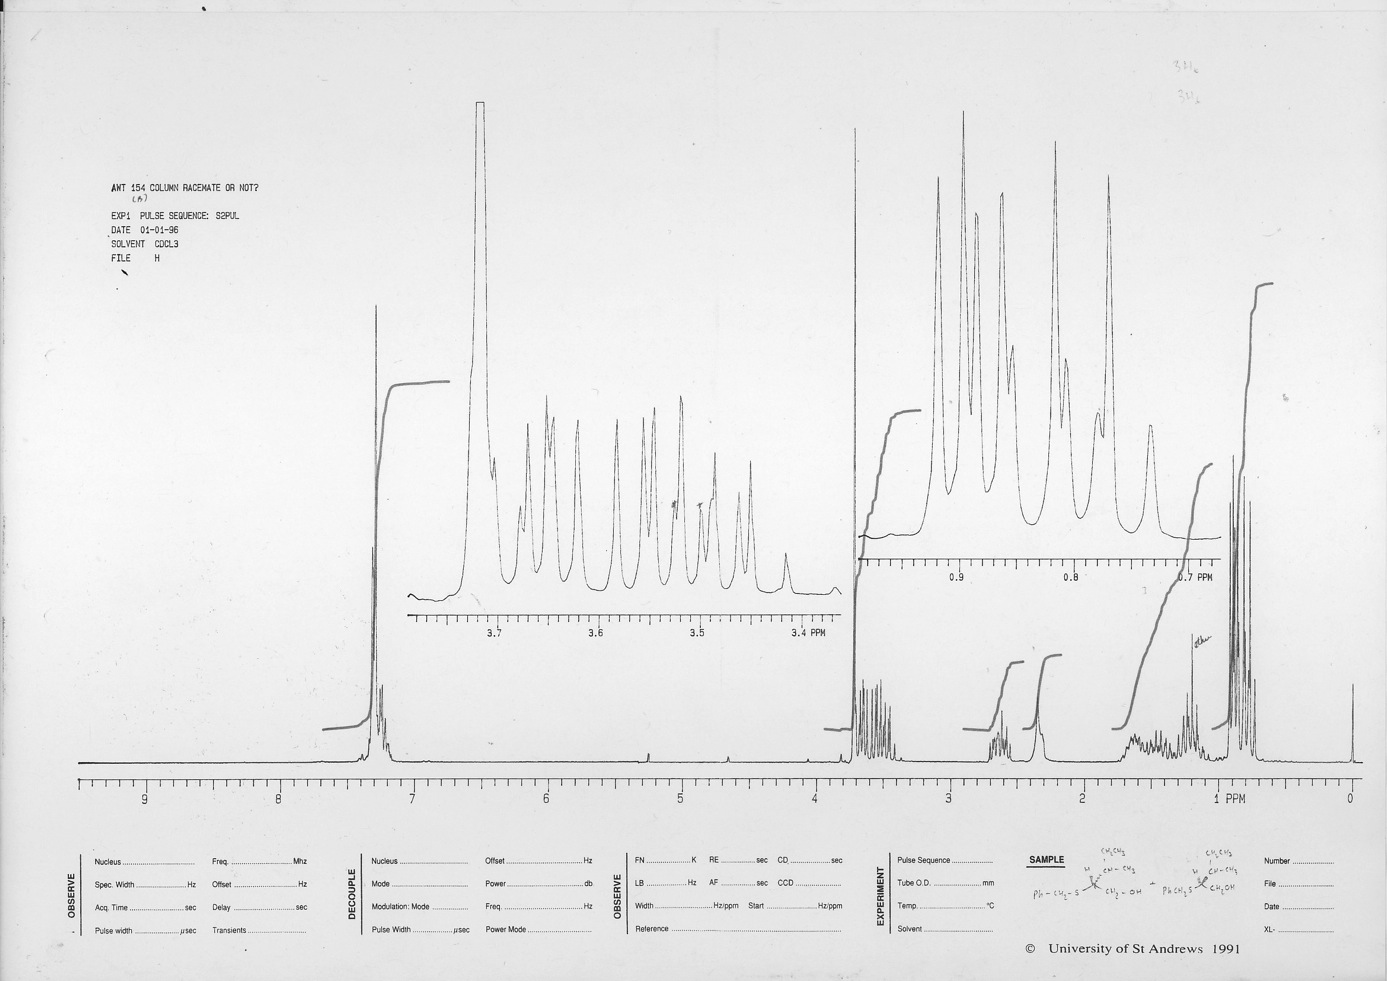


75 MHz 13C NMR spectrum of **15**


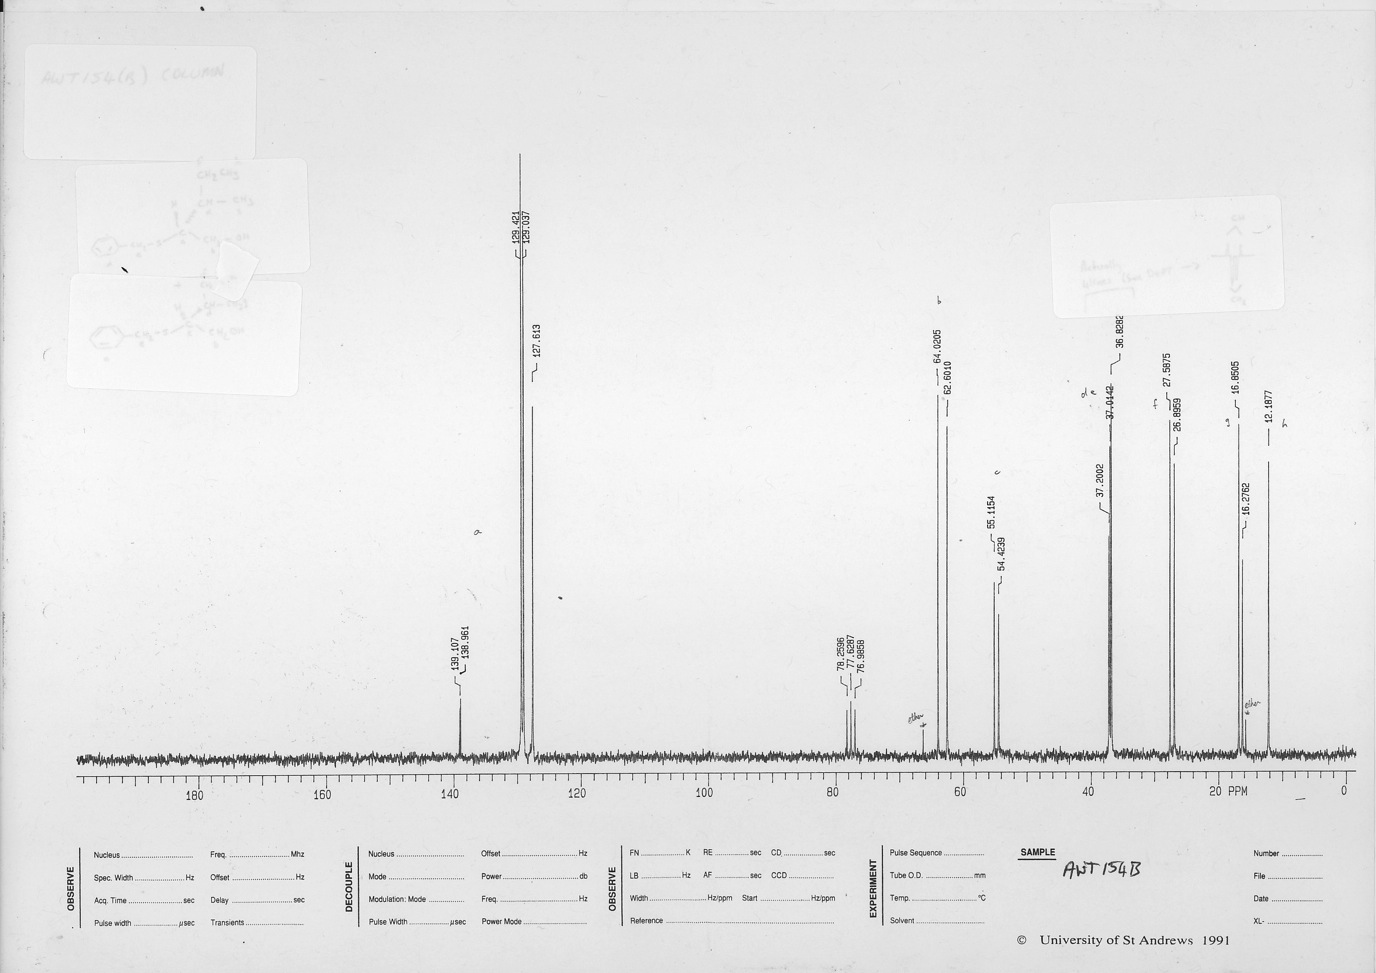


300 MHz 1H NMR spectrum of **16**


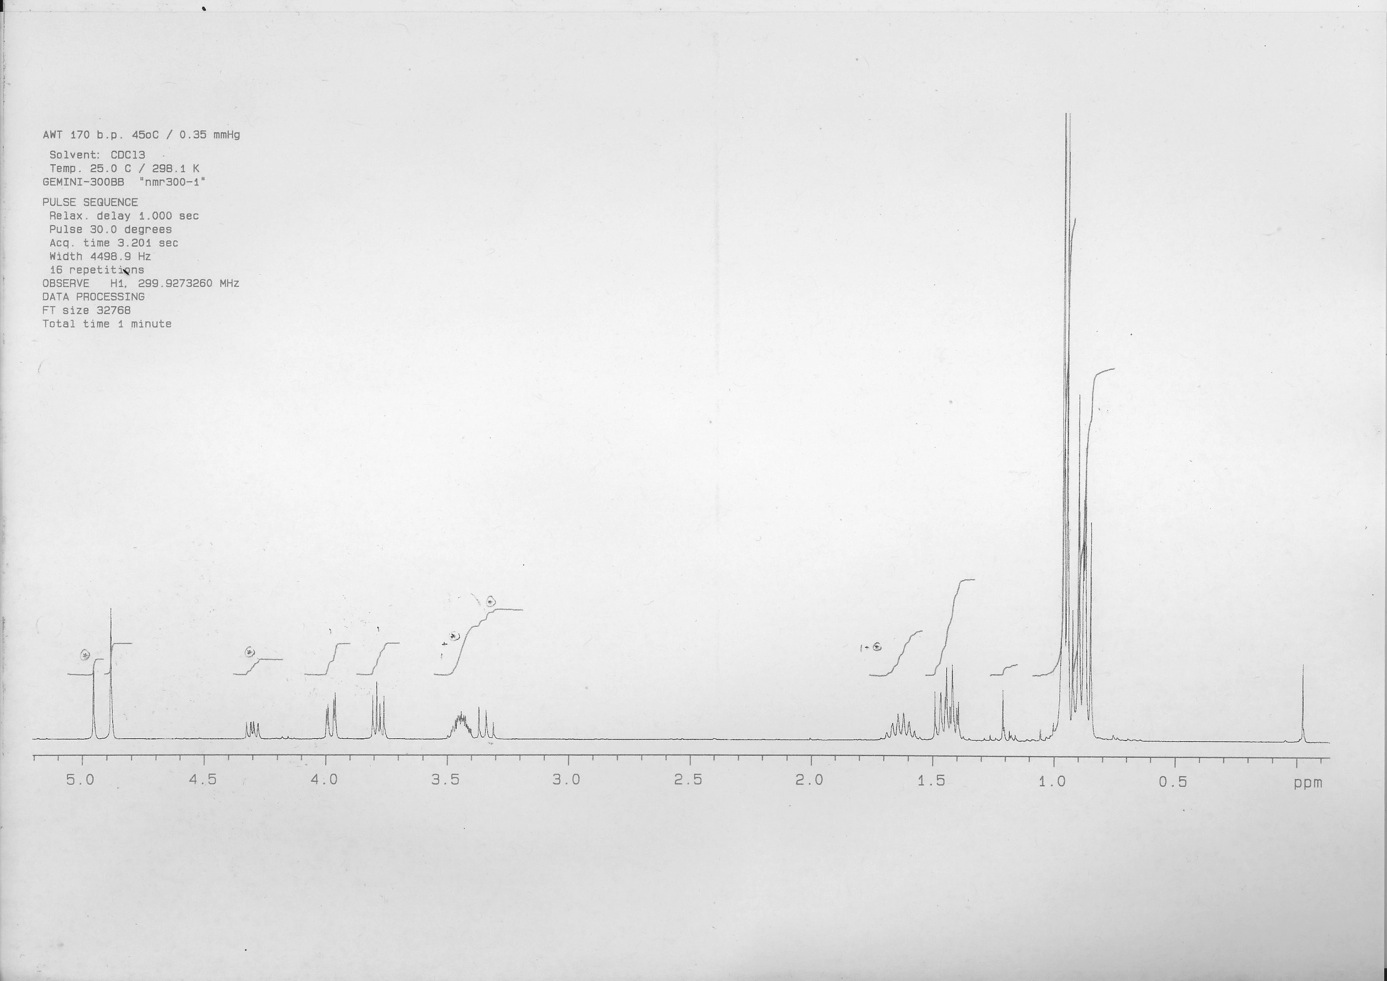


75 MHz 13C NMR spectrum of **16**


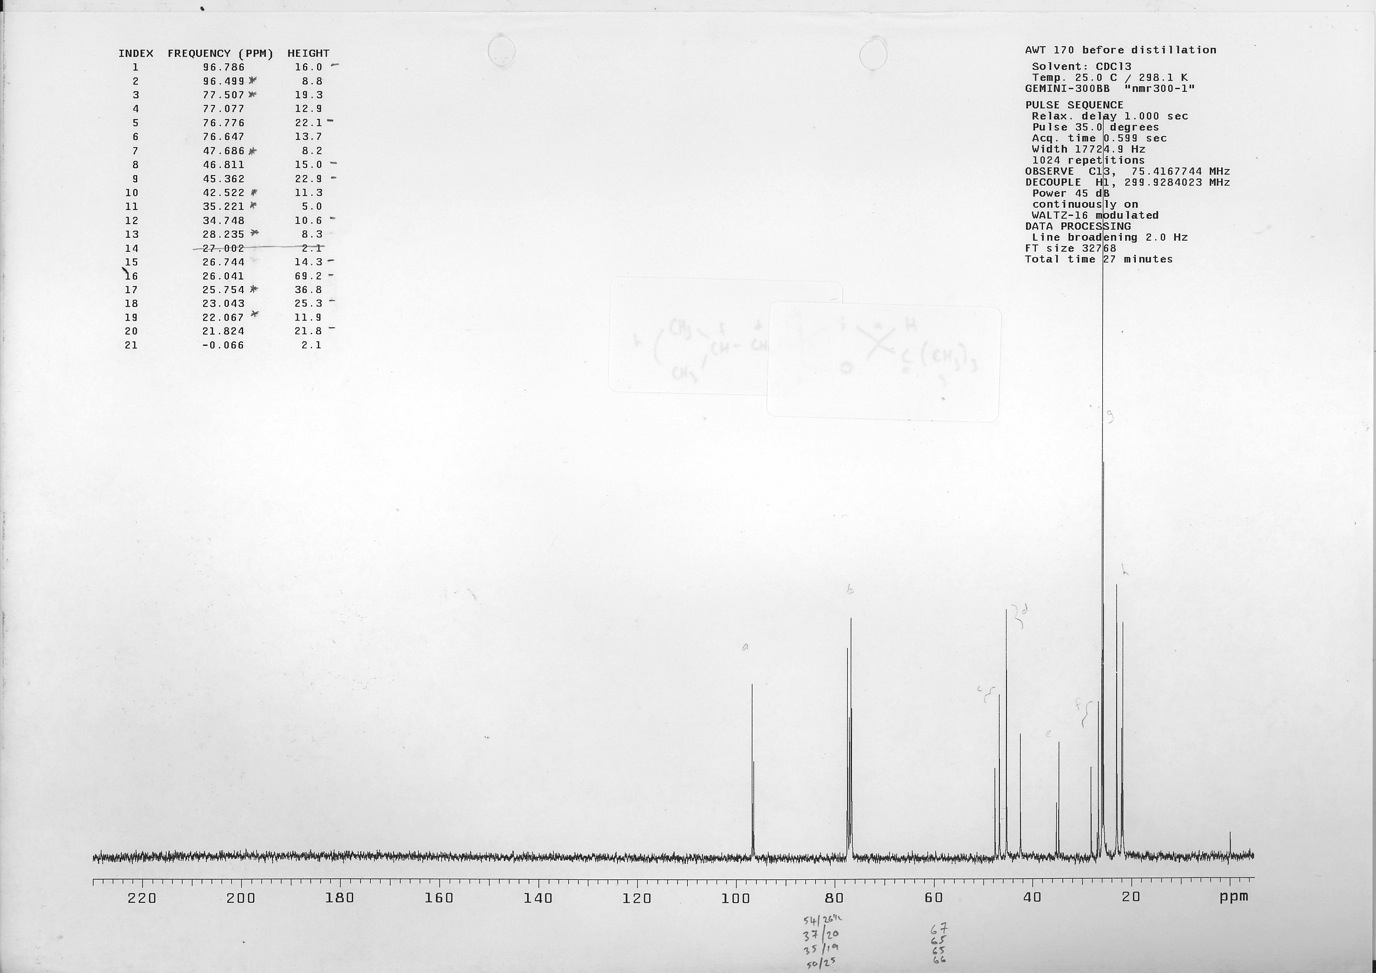


300 MHz 1H NMR spectrum of **17**


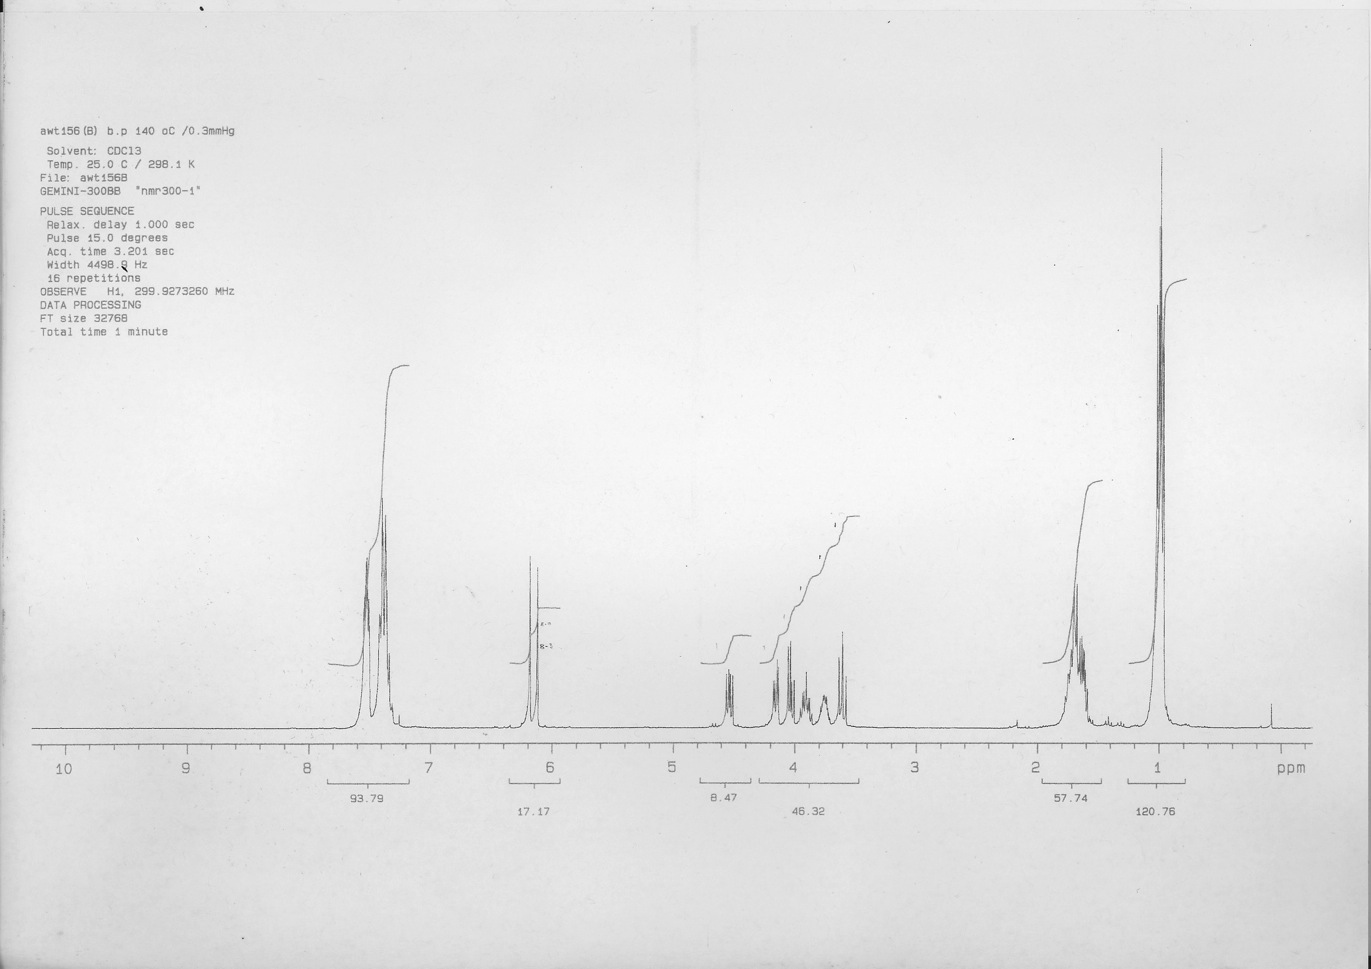


75 MHz 13C NMR spectrum of **17**


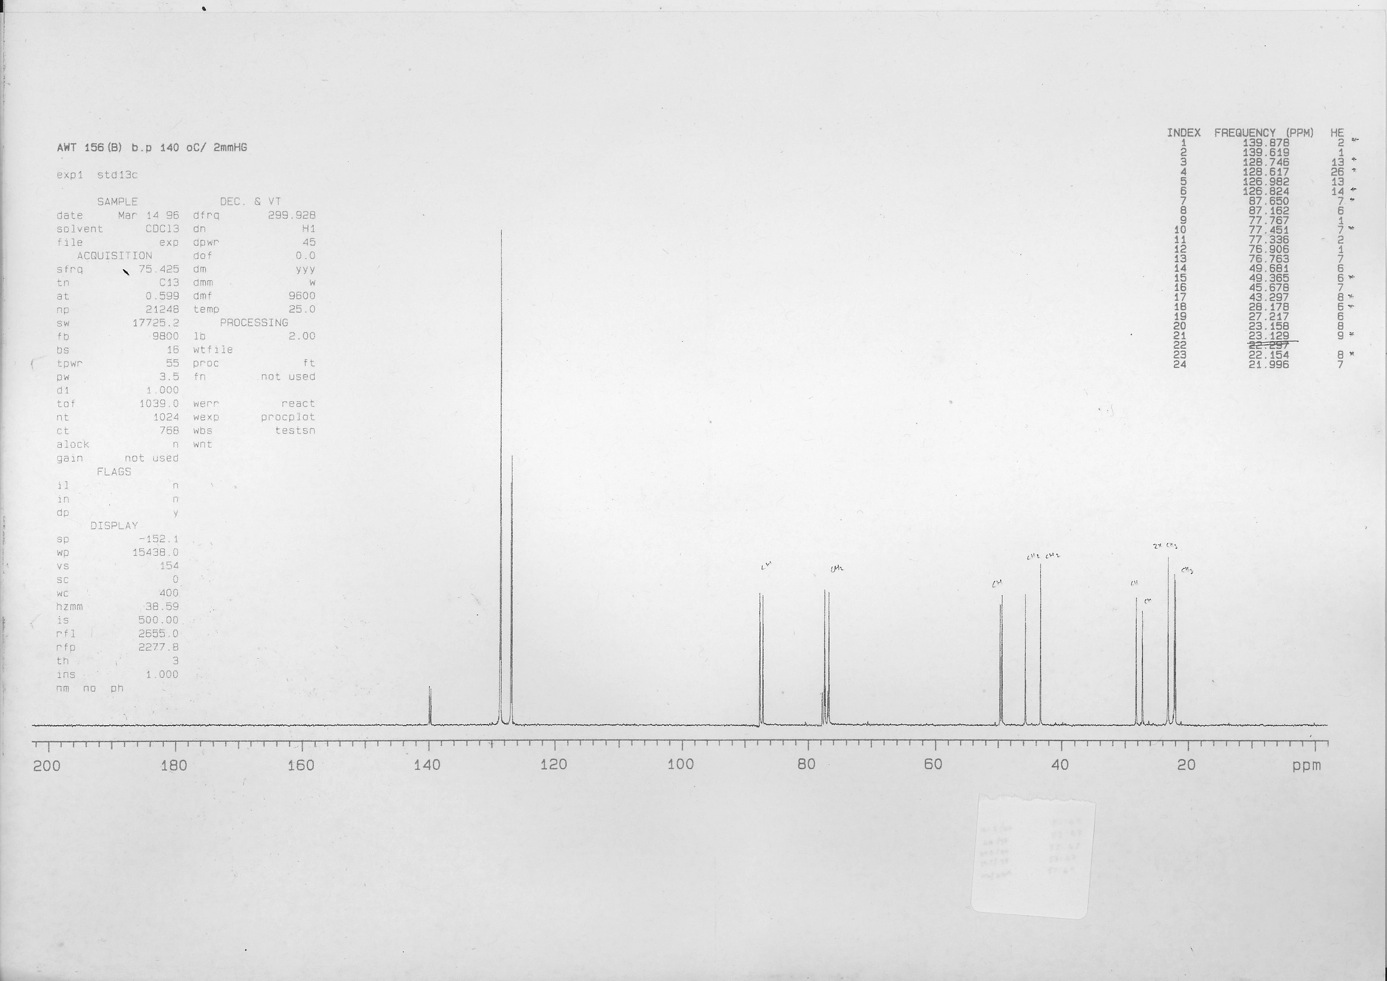


300 MHz 1H NMR spectrum of **19**


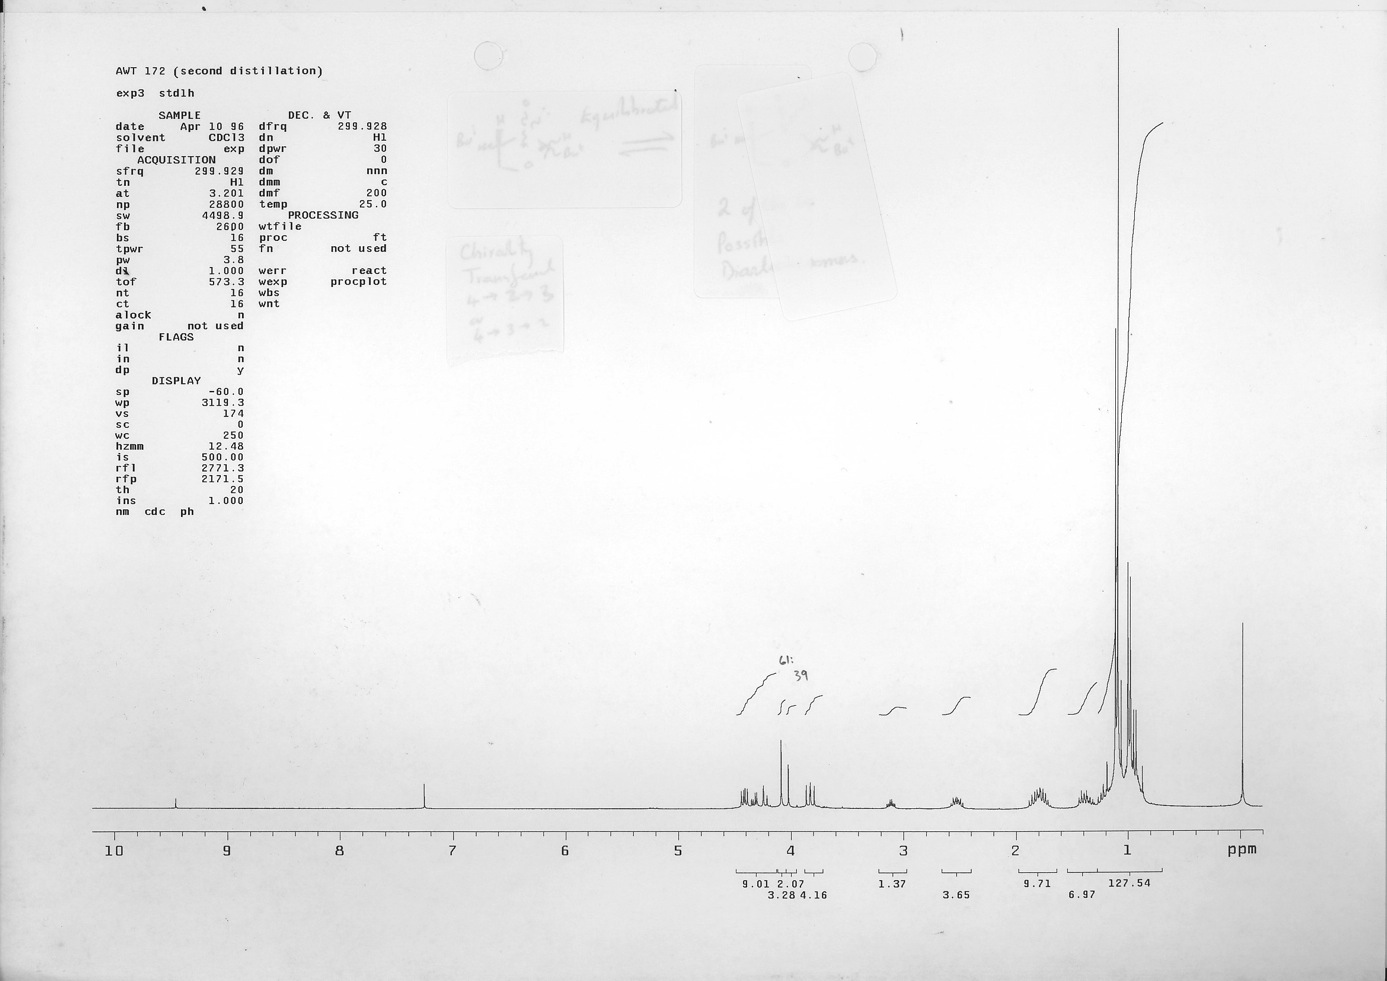


75 MHz 13C NMR spectrum of **19**


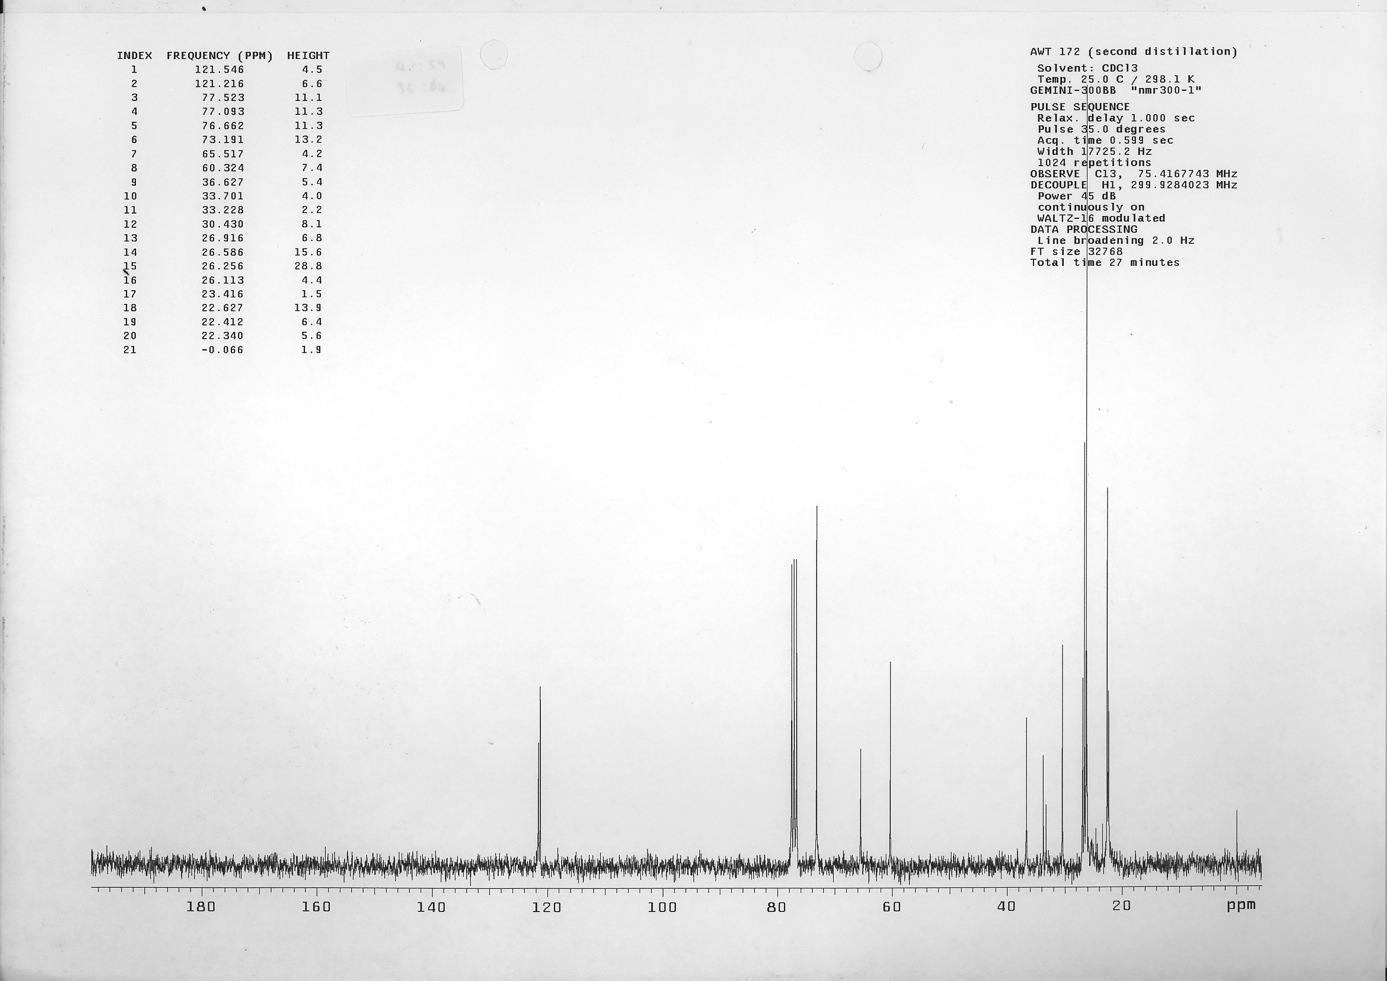


300 MHz 1H NMR spectrum of **20**


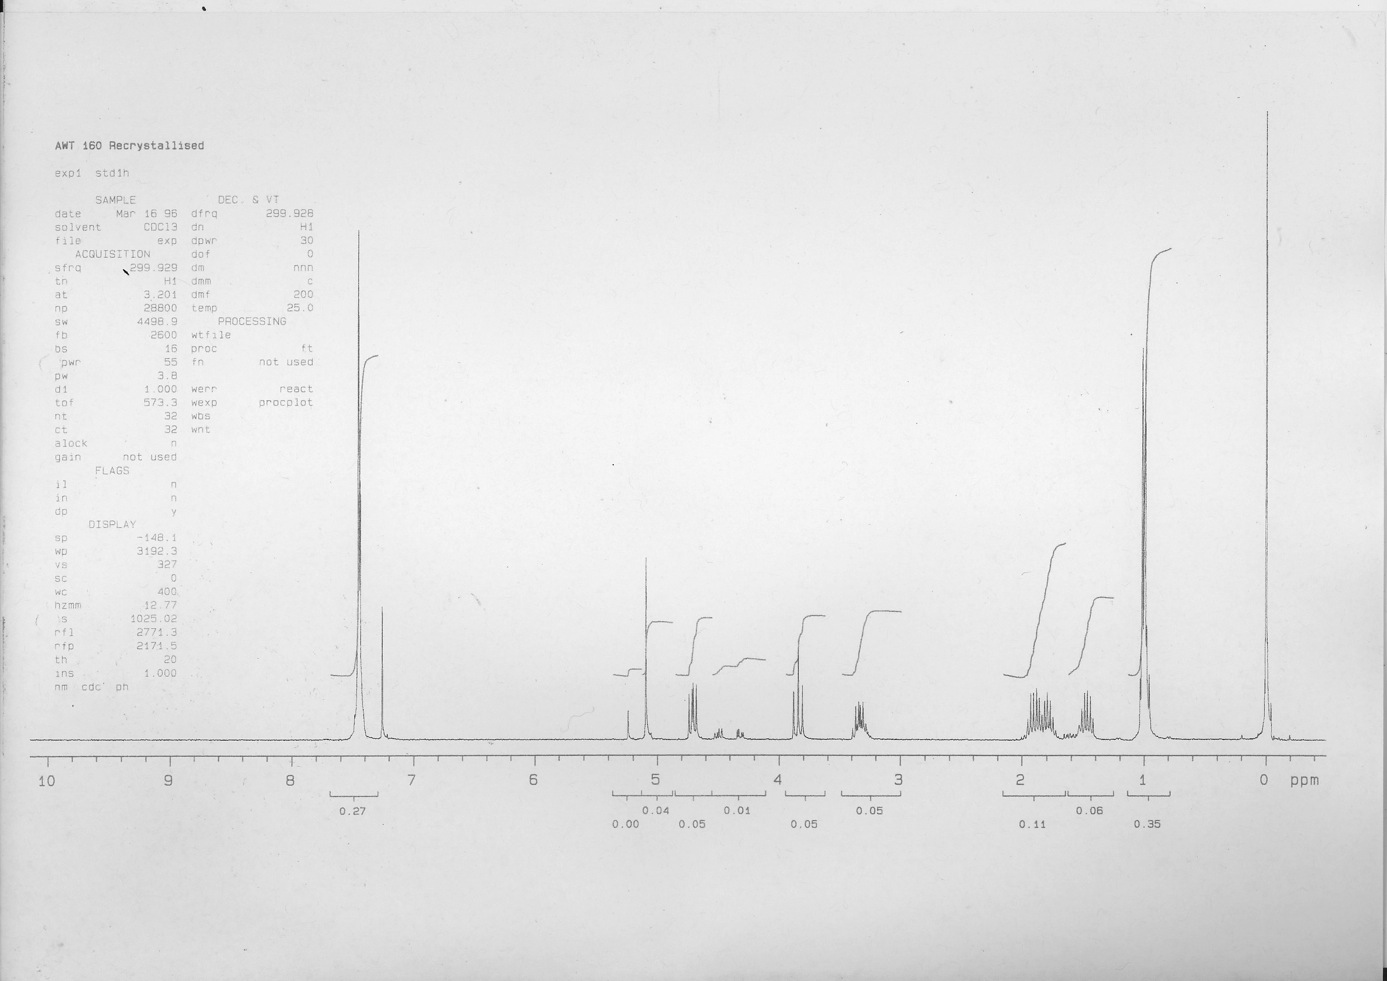


75 MHz 13C NMR spectrum of **20**


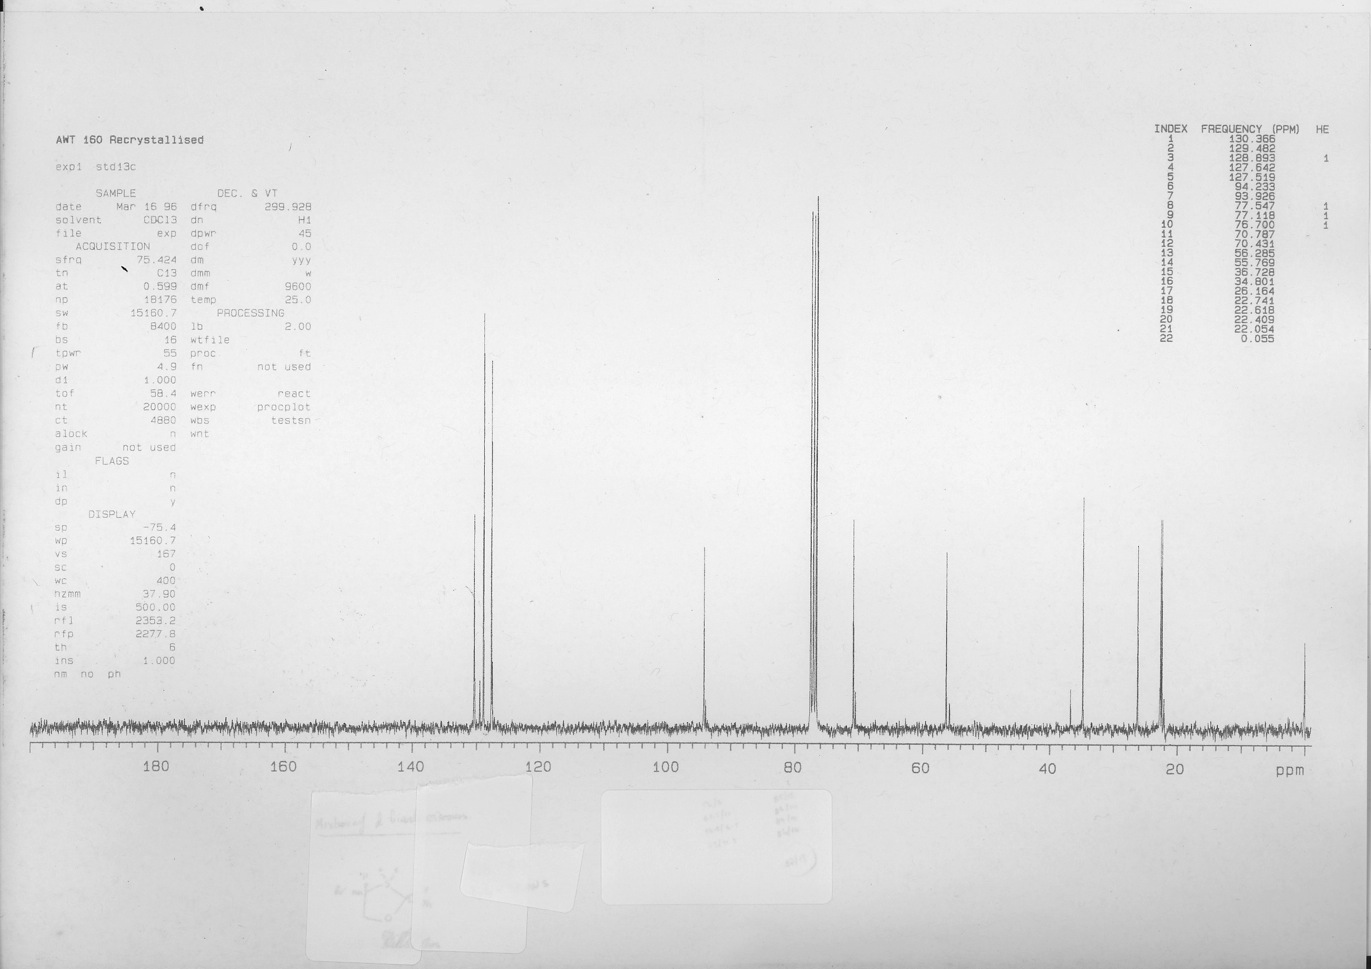


300 MHz 1H NMR spectrum of *trans-***18**


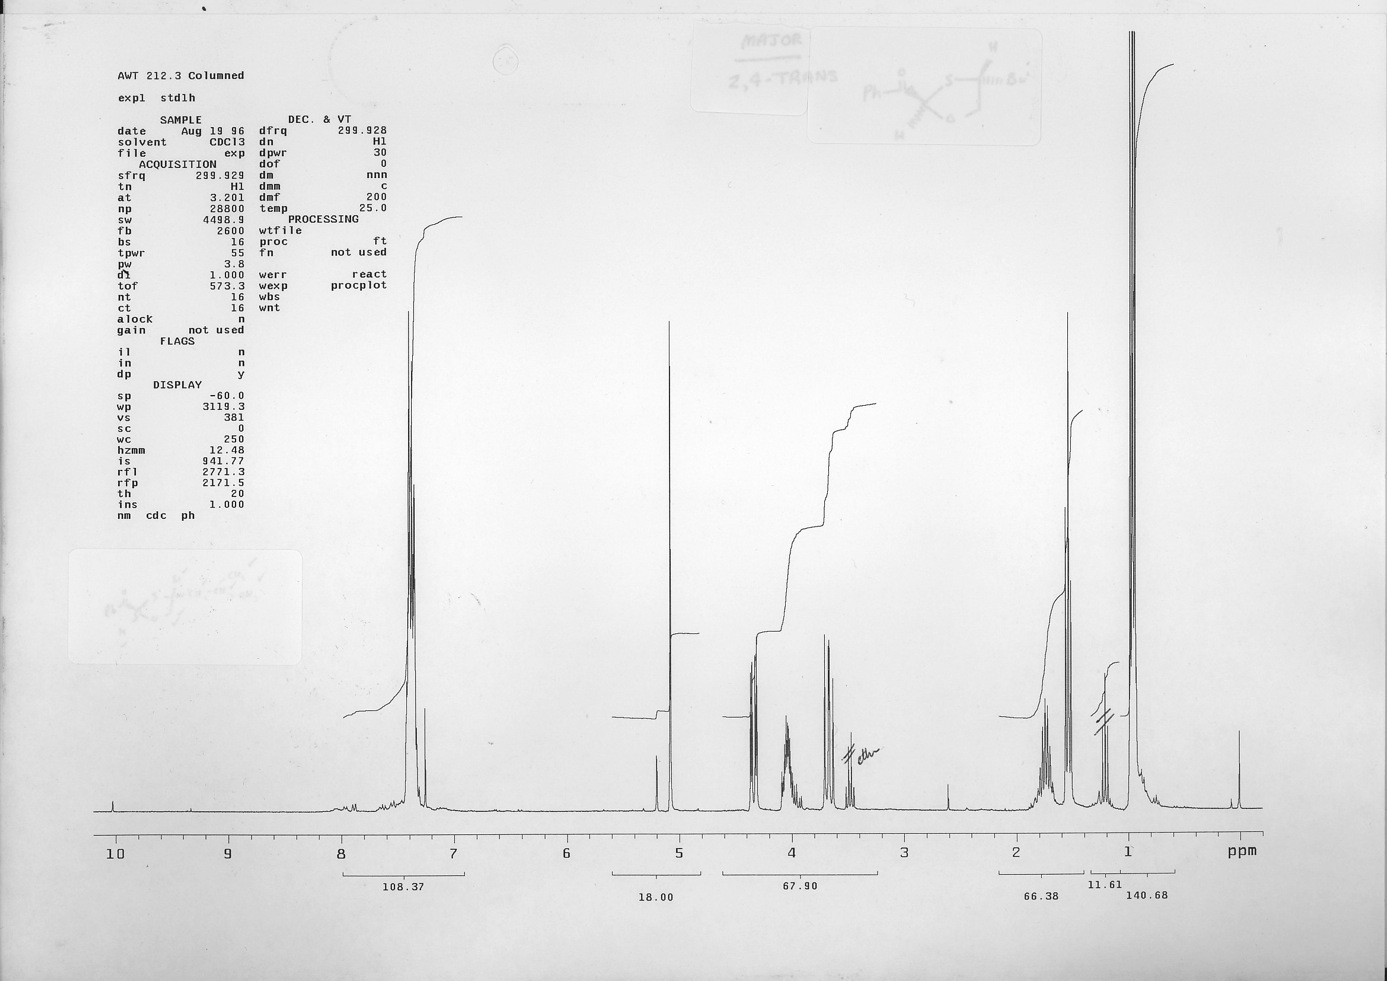


75 MHz 13C NMR spectrum of *trans-***18**


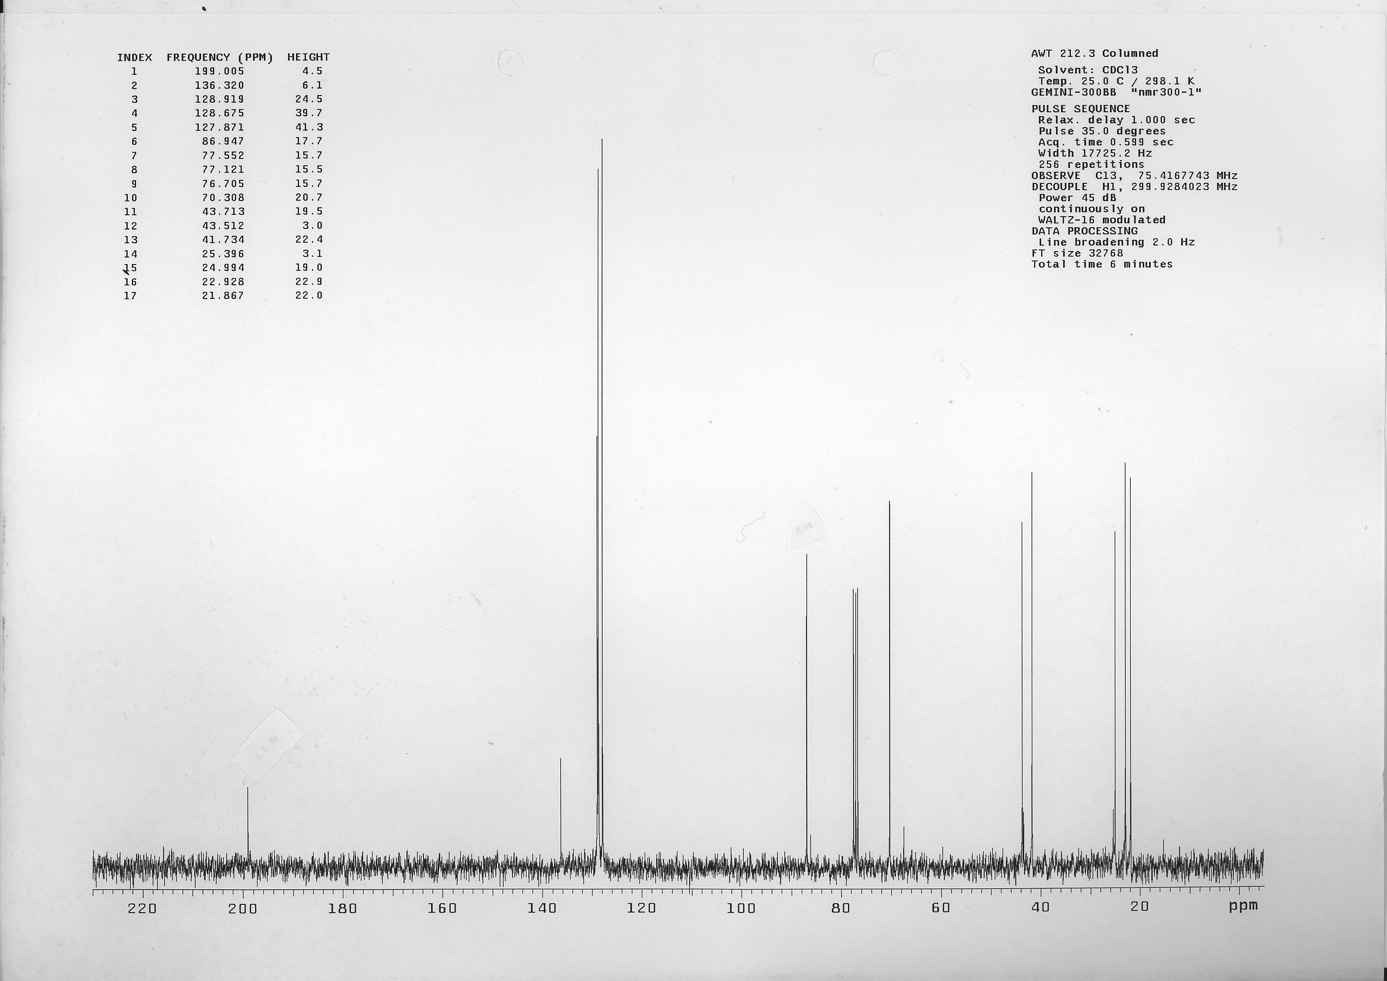


200 MHz 1H NMR spectrum of FVP product from **20**


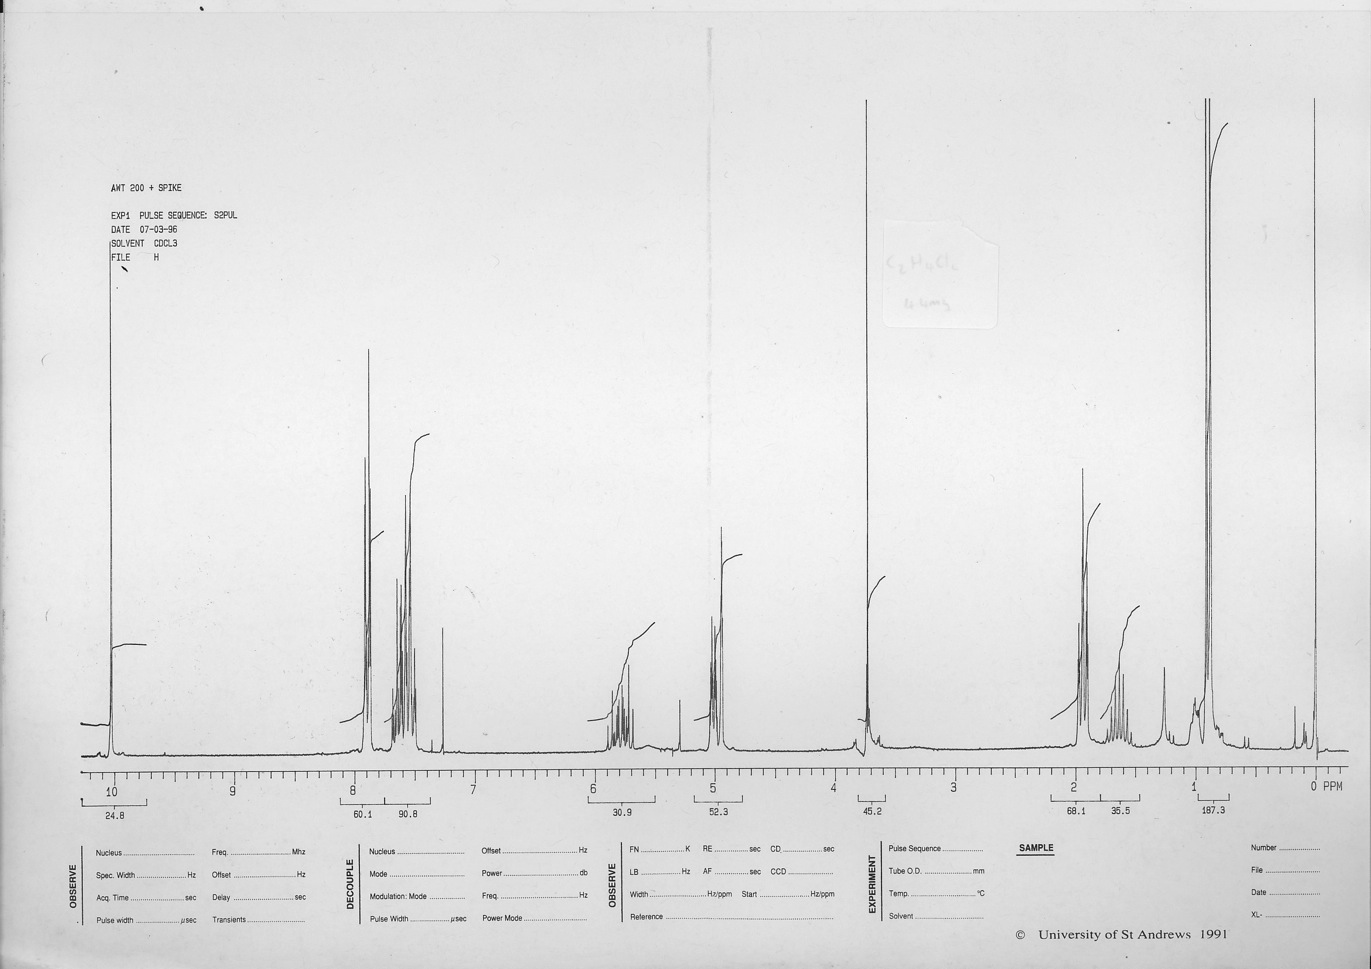


75 MHz 13C NMR spectrum of FVP product from **20**


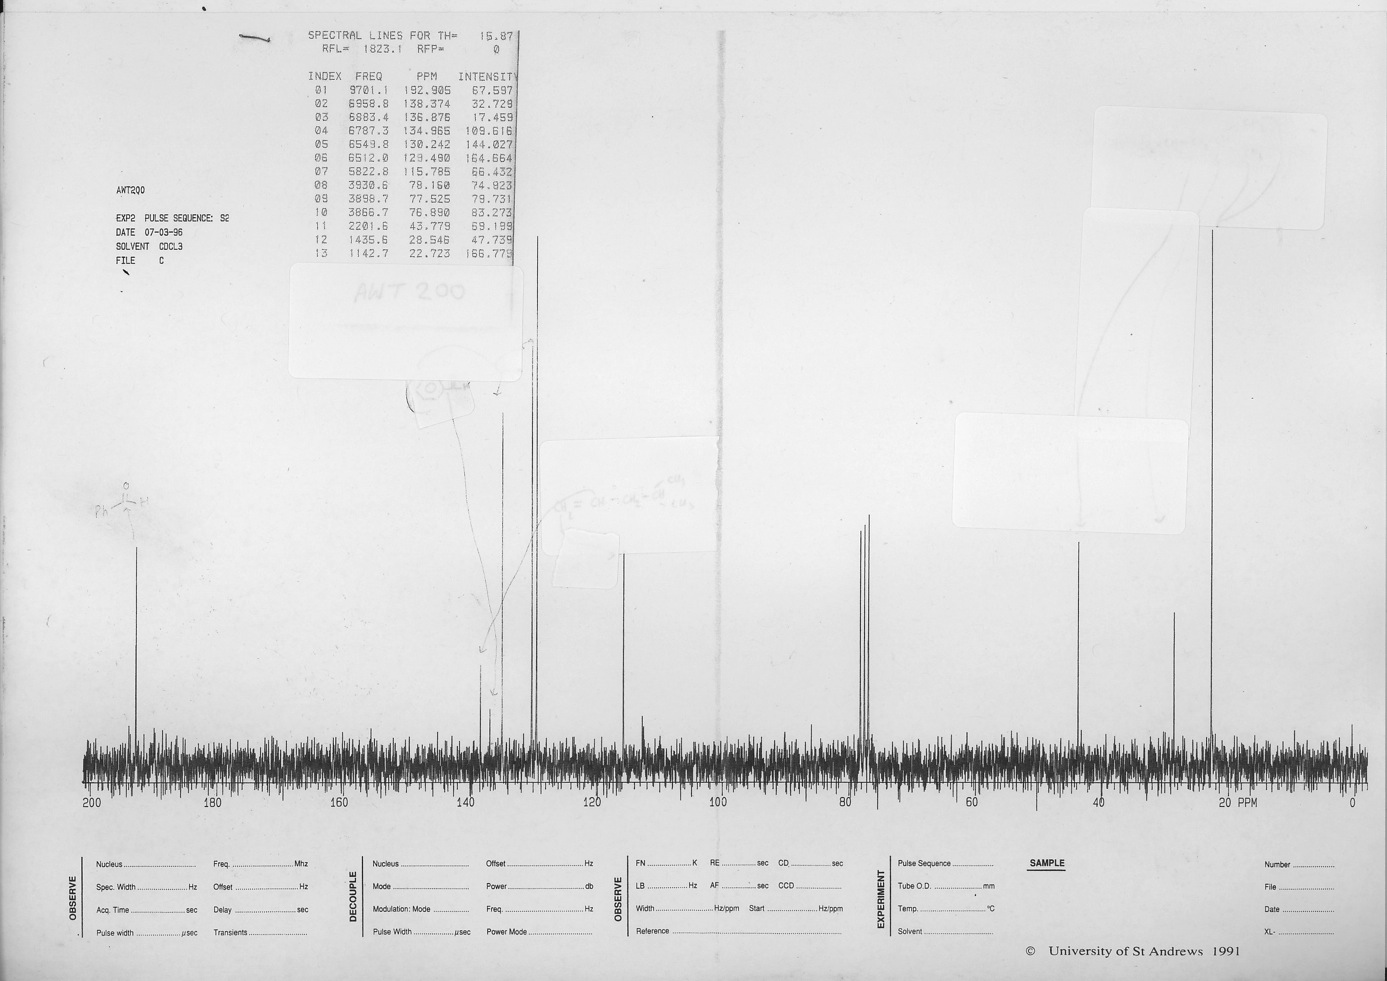

Supplement: Supplementary file 1 [file 22408623]
